1 27 September 2019

2

3

4 **HCMV glycoprotein B nucleoside-modified mRNA vaccine elicits antibody responses with**  
5 **greater durability and breadth than MF59-adjuvanted gB protein immunization**

6

7 **Short Title:** Immunogenicity of next-generation HCMV gB vaccines

8

9 Cody S. Nelson<sup>1\*</sup>, Jennifer A. Jenks<sup>1</sup>, Norbert Pardi<sup>2</sup>, Matthew Goodwin<sup>1</sup>, Hunter Roark<sup>1</sup>, Whitney  
10 Edwards<sup>3</sup>, Jason S. McLellan<sup>4</sup>, Justin Pollara<sup>3</sup>, Drew Weissman<sup>2</sup>, Sallie R. Permar<sup>1</sup>

11

12 <sup>1</sup>Human Vaccine Institute, Duke University Medical Center, Durham, NC, USA.

13 <sup>2</sup>Department of Medicine, University of Pennsylvania Perelman School of Medicine, Philadelphia,  
14 PA, USA.

15 <sup>3</sup>Department of Surgery, Duke University Medical Center, Durham, NC, USA.

16 <sup>4</sup>Department of Molecular Biosciences, University of Texas at Austin, Austin, TX, USA.

17

18 \* Please address correspondence to Cody S. Nelson ([cody.nelson@duke.edu](mailto:cody.nelson@duke.edu))

19

20

21 **Keywords:** cytomegalovirus, vaccines, glycoprotein B

22

23 **Abstract WC:** 300 (300 max)

24 **Author summary WC:** 188 (200 max)

25 **Main Text WC:** 3,177

26 **Methods WC:** 3,142

27 **Abstract:**

28 A vaccine to prevent maternal acquisition of human cytomegalovirus (HCMV) during pregnancy  
29 is a primary strategy to reduce the incidence of congenital disease. Similarly, vaccination of  
30 transplant recipients against HCMV has been proposed to prevent transplant-associated HCMV  
31 morbidity. The MF59-adjuvanted glycoprotein B protein subunit vaccine (gB/MF59) is the most  
32 efficacious tested to-date for both indications. We previously identified that gB/MF59 vaccination  
33 elicited poor neutralizing antibody responses and an immunodominant response against gB  
34 antigenic domain 3 (AD-3). Thus, we sought to test novel gB vaccines to improve functional  
35 antibody responses and reduce AD-3 immunodominance. Groups of juvenile New Zealand White  
36 rabbits were administered 3 sequential doses of full-length gB protein with an MF59-like squalene  
37 adjuvant (analogous to clinically-tested vaccine), gB ectodomain protein (lacking AD-3) with  
38 squalene adjuvant, or lipid nanoparticle (LNP)-packaged nucleoside-modified mRNA encoding  
39 full-length gB. The AD-3 immunodominant IgG response following human gB/MF59 vaccination  
40 was closely mimicked in rabbits, with 78% of binding antibodies directed against this region in the  
41 full-length gB protein group compared to 1% and 46% in the ectodomain and mRNA-LNP-  
42 vaccinated groups, respectively. All vaccines were highly immunogenic with similar kinetics and  
43 comparable peak gB-binding and functional antibody responses. Although gB ectodomain subunit  
44 vaccination reduced targeting of non-neutralizing epitope AD-3, it did not improve vaccine-elicited  
45 neutralizing or non-neutralizing antibody functions. gB nucleoside-modified mRNA-LNP-  
46 immunized rabbits exhibited enhanced durability of IgG binding to soluble and cell membrane-  
47 associated gB protein as well as HCMV-neutralizing function. Furthermore, the gB mRNA-LNP  
48 vaccine enhanced breadth of IgG binding responses against discrete gB peptide residues. Finally,  
49 low-magnitude gB-specific T cell activity was observed in the full-length gB protein and mRNA-  
50 LNP vaccine groups, though not in ectodomain-vaccinated rabbits. Altogether, these data suggest  
51 that the gB mRNA-LNP vaccine candidate, aiming to improve upon the partial efficacy of gB/MF59  
52 vaccination, should be further evaluated in preclinical models.

53 **Author summary:**

54 Human cytomegalovirus (HCMV) is the most common infectious cause of infant birth defects,  
55 resulting in permanent neurologic disability for one newborn child every hour in the United States.  
56 Furthermore, this virus causes significant morbidity and mortality in immune-suppressed  
57 transplant recipients. After more than a half century of research and development, we remain  
58 without a clinically-licensed vaccine or therapeutic to reduce the burden of HCMV-associated  
59 disease. In this study, we sought to improve upon the glycoprotein B protein vaccine (gB/MF59),  
60 the most efficacious HCMV vaccine evaluated in clinical trial, via targeted modifications to either  
61 the protein structure or vaccine formulation. An attempt to alter the protein structure to focus the  
62 immune response on vulnerable epitopes ('gB ectodomain') had little effect on the quality or  
63 function of the vaccine-elicited antibodies. However, a novel vaccine platform, nucleoside-  
64 modified mRNA formulated in lipid nanoparticles, increased the durability and breadth of vaccine-  
65 elicited immune responses. We propose that an mRNA-based gB vaccine may ultimately prove  
66 more efficacious than the gB/MF59 vaccine and should be further evaluated for its ability to elicit  
67 antiviral immune factors that can prevent both infant and transplant-associated disease caused  
68 by HCMV infection.

69 **Introduction:**

70 Human cytomegalovirus (HCMV) impacts 1 in 150 live born infants, making this pathogen  
71 the most common cause of congenital infection worldwide [1, 2]. Approximately 20% of infants  
72 infected with HCMV *in utero* will develop long-term sequelae including microcephaly, intrauterine  
73 growth restriction, hearing/vision loss, or neurodevelopmental delay [3, 4]. Furthermore, HCMV  
74 is the most prevalent infection among solid organ and hematopoietic stem cell transplant  
75 recipients, causing end-organ disease such as gastroenteritis, pneumonitis, or hepatitis and  
76 potentially predisposing these individuals to allograft rejection and/or failure [5, 6]. However, we  
77 remain without a vaccine or immunotherapeutic intervention to reduce the burden of disease  
78 among newborn children and transplant recipients.

79 A variety of vaccine platforms and formulations have been trialed for the prevention of  
80 both congenital (reviewed in [7]) and transplant-associated HCMV disease (reviewed in [8]), of  
81 which the most efficacious has been the glycoprotein B (gB) subunit vaccine administered with  
82 MF59 squalene adjuvant [9]. gB is the viral fusogen and is essential for entry into all cell types  
83 [10], including placental trophoblast progenitor cells [11]. Furthermore, gB is highly-expressed  
84 and an immune-dominant target following natural infection, making this protein an attractive target  
85 for vaccination. gB/MF59 subunit vaccination demonstrated moderate (~50%) efficacy in blocking  
86 HCMV infection and host seroconversion in populations of HCMV-seronegative postpartum [12]  
87 and adolescent women [13]. Furthermore, in transplant recipients this vaccine protected against  
88 HCMV viremia and reduced the clinical need for antiviral treatment [14].

89 Analysis of samples obtained from both postpartum and transplant-recipient gB vaccinees  
90 revealed two key observations regarding the target and function of gB-elicited antibody responses  
91 that inform our understanding of the partial vaccine efficacy. First, we identified that vaccination  
92 elicited an extraordinarily robust response against antigenic domain 3 (AD-3), a cytosolic non-  
93 neutralizing epitope in the C-terminal region of the protein [15]. Second, we noted that gB-specific  
94 antibodies elicited in postpartum women and transplant-recipients were predominantly non-

95 neutralizing, suggesting that the mechanism of partial protection against viral acquisition was not  
96 the induction of neutralizing antibodies [15, 16]. However, the protective non-neutralizing function  
97 remains unclear: we identified that gB/MF59 vaccinees had high-magnitude viral phagocytosis  
98 activity, though magnitude was not associated with infection status [15]. These results led us to  
99 hypothesize that we might improve upon the gB/MF59 vaccine through rational design of novel  
100 immunogens that minimize responses against the intracellular to gB AD-3 epitope.

101 Here we present an investigation into the immunogenicity of two novel gB vaccines aiming  
102 to reduce exposure to AD-3: a truncated gB protein subunit vaccine (lacking the AD-3 epitope)  
103 administered with MF59-like squalene adjuvant AddaVax (gB ectodomain vaccine) and a gB  
104 nucleoside-modified mRNA vaccine packaged in lipid nanoparticles (gB mRNA-LNP vaccine).  
105 New Zealand White rabbits were selected for this study because we previously identified that  
106 neutralizing and non-neutralizing antibodies are elicited in rabbits by vaccination, and that F<sub>c</sub>  
107 receptor-independent and dependent effector functions can be measured *in vitro* [17]. Three  
108 groups of rabbits were vaccinated with either: 1) full-length gB + AddaVax (immunogen from  
109 gB/MF59 vaccine trial; 'gB FL'), 2) gB ectodomain + AddaVax ('gB ecto'), or 3) gB mRNA-LNP  
110 ('gB mRNA'). We anticipated that gB ectodomain and gB mRNA-LNP vaccines would have  
111 reduced targeting of AD-3 and enhanced neutralizing and/or non-neutralizing function, resulting  
112 in a superior vaccine that might be deployed to prevent both congenital and transplant-associated  
113 HCMV disease.

114 **Results:**

115 *IgG binding to soluble and cell-associated gB*

116 We first assessed the ability of IgG elicited by all three vaccines (**Figure 1**; gB FL, gB  
117 ecto, and gB mRNA) to bind soluble full-length gB (**Figure 2A**) and gB ectodomain proteins  
118 (**Figure 2B**) by BAMA, as well as cell-associated gB on the surface of gB-transfected cells by flow  
119 cytometry (**Figure 2C**). All vaccines were highly immunogenic, with similar peak immunogenicity  
120 (10 weeks) binding magnitude to both soluble and cell-associated gB. However, gB mRNA-  
121 immunized rabbits had enhanced binding to both soluble and cell-associated gB at the time of  
122 animal necropsy (20 weeks), indicating superior durability of the mRNA vaccine-elicited antibody  
123 responses compared to gB FL. This distinction was most pronounced for binding to cell-  
124 associated gB (median % PE+ cells at 20 weeks: mRNA = 29.1% vs FL = 18.8%,  $p=0.01$ , Kruskal-  
125 Wallis + *post hoc* Mann-Whitney U test). Additionally, we evaluated the avidity of vaccine-elicited  
126 IgG responses by plate-based, urea wash ELISA (**Figure 2D**). We noted slightly reduced median  
127 RAI (relative avidity index, measured against soluble gB FL protein) in gB mRNA-immunized  
128 rabbits, though the difference was not statistically significant.

129

130 *Linear gB epitope binding*

131 To identify the epitope specificity and breadth of IgG responses elicited by each vaccine,  
132 we utilized a peptide microarray library consisting of 15-mers overlapping each subsequent  
133 peptide by 10 residues and spanning the entire gB ORF (Towne strain) (**Figure 3A**). We observed  
134 that rabbits administered the gB FL vaccine had a nearly identical AD-3 epitope  
135 immunodominance to that observed in human gB/MF59 vaccinees [18], with 77% of the peptide-  
136 binding IgG response directed against this singular region (vs. 78% in human vaccinees). AD-3  
137 linear peptide binding was dramatically reduced in gB ecto (<1%) and gB mRNA (46%) groups.  
138 However, AD-3 remained the dominant response in gB FL and gB mRNA groups, while the furin  
139 cleavage site was dominant for gB ecto (no AD-3 in the immunogen) (**Figure S1**). Furthermore,

140 gB mRNA vaccinated rabbits had slightly reduced total peptide binding compared to gB FL  
141 (**Figure 3B**; median peptide-binding MFI sum: FL = 96,629, mRNA = 48,051,  $p=ns$ , Kruskal-Wallis  
142 + *post hoc* Mann-Whitney U test), though both gB FL and gB mRNA had greater total peptide  
143 binding than the gB ecto group (both  $p<0.05$ , Kruskal-Wallis + *post hoc* Mann-Whitney U test).  
144 Importantly, there was enhanced breadth of peptide-binding responses in gB mRNA vaccinated  
145 rabbits compared to both gB FL and gB ecto groups (**Figure 3D**; median number of discrete  
146 peptides bound: FL = 44.5, ecto = 28.5, mRNA = 85, both  $p<0.05$ , Kruskal-Wallis + *post hoc*  
147 Mann-Whitney U test). Of note, the pattern of linear peptide binding and breadth of mRNA-  
148 immunized rabbits appears analogous to that elicited by natural HCMV infection [18].

149

#### 150 *Vaccine-elicited IgG binding to neutralizing epitopes and HCMV neutralization*

151 We next examined IgG binding to regions of gB known to be targeted by neutralizing  
152 antibodies Domain 1 (AD-4), Domain 1+2 (AD-4 + AD-5), AD-1, and AD-2 (**Figure 4A-D**). Notably,  
153 we did not identify vaccine-elicited antibodies against AD-2 in any of the 3 vaccine groups (**Figure**  
154 **4D**), an epitope known to be the target of potently-neutralizing gB-specific antibodies associated  
155 with reduced viremia in transplant recipients [19] and protection against congenital transmission  
156 [20]. Furthermore, low responses were noted against AD-1 (**Figure 4C**). The kinetics of vaccine-  
157 elicited IgG binding against Domain 1 as well as Domain 1+2 mirrored those of binding to soluble  
158 gB protein (**Figure 2**). However, at 20 weeks both gB ecto and gB mRNA vaccinated rabbits had  
159 enhanced binding against Domain 1 compared to gB FL (median Domain 1 MFI at 20 weeks: FL  
160 = 571, ecto = 2,343, mRNA = 2,730,  $p<0.05$  for both, Kruskal-Wallis + *post hoc* Mann-Whitney U  
161 test) (**Figure 4A**).

162 Furthermore, we assessed the magnitude of vaccine-elicited HCMV neutralization against  
163 heterologous (cross strain) AD169-revertant virus in fibroblast and epithelial cell lines, both in the  
164 presence and absence of purified rabbit complement (**Figure 4E-H**). Neutralization was enhanced  
165 in the presence of complement (**Figure 4G,H**) as previously noted [18]. All three vaccines had

166 similar peak neutralization at 10 weeks (median AD169r ID<sub>50</sub> in fibroblast at 10 weeks +C: FL =  
167 158, ecto = 184, mRNA = 174). gB mRNA vaccinated rabbits had two-fold higher virus  
168 neutralization at 20 weeks, indicating superior response durability, though this distinction was not  
169 statistically significant (median AD169r ID<sub>50</sub> in fibroblast at 20 weeks +C: FL = 49, ecto = 62,  
170 mRNA = 120, p=0.12, Kruskal-Wallis + *post hoc* Mann-Whitney U test). Notably, neutralizing  
171 responses measured in both fibroblast and epithelial cells were similar in magnitude, as might be  
172 expected for gB-specific antibodies. In addition to heterologous AD169r, we also measured  
173 neutralization of autologous (vaccine strain) Towne virus in fibroblast cells (**Figure S2A,B**), but  
174 identified little difference between vaccination groups.

175

#### 176 *Vaccine-elicited engagement of F<sub>c</sub>γ receptors and non-neutralizing effector functions*

177 We next investigated the ability of vaccine-elicited antibodies to engage F<sub>c</sub>γ receptors  
178 (specifically F<sub>c</sub>γRI, F<sub>c</sub>γRIIa, F<sub>c</sub>γRIIb, and F<sub>c</sub>γRIIIa) which is a prerequisite for F<sub>c</sub>-mediated effector  
179 functions (**Figure 5A-D**). Intriguingly, a single dose of gB mRNA vaccine (but not gB FL or gB  
180 ecto) resulted in the rapid development of antigen-specific IgG that could engage with F<sub>c</sub> receptors  
181 (**Figure S3**), which might be due to robust induction of T follicular helper cells that facilitate B cell  
182 maturation and class switching [21]. This distinction was most notable for F<sub>c</sub>γRIIa and F<sub>c</sub>γRIIb (2  
183 weeks median F<sub>c</sub>γRIIa MFI: FL = 0 vs. mRNA = 128, p=0.02, Kruskal-Wallis + *post hoc* Mann-  
184 Whitney U test). At peak immunogenicity (10 weeks), gB-specific antibody engagement of F<sub>c</sub>γ  
185 receptors was similar between vaccine groups. However, at the time of necropsy we generally  
186 noted enhanced median binding to F<sub>c</sub>γR's among gB mRNA-vaccinated rabbits vs. gB FL, though  
187 this comparison was only significant for F<sub>c</sub>γRIIIa (20 weeks median F<sub>c</sub>γRIIIa MFI: FL = 3,929 vs.  
188 mRNA = 10,933, p=0.02, Kruskal-Wallis + *post hoc* Mann-Whitney U test).

189 We next investigated the magnitude of non-neutralizing, F<sub>c</sub> effector functions mediated by  
190 vaccine-elicited antibodies. First, we measured antibody-dependent cellular phagocytosis  
191 (ADCP) of whole HCMV virions (TB40/E strain) (**Figure 5E**). We identified similar peak



192 phagocytosis activity (10 weeks), but intriguingly we noted enhanced phagocytosis in gB FL  
193 vaccinees at 20 weeks indicating more robust phagocytosis durability in this group (median  
194 %phagocytosing cells: FL = 10.1% vs. mRNA = 7.1%,  $p < 0.01$ , Kruskal-Wallis + *post hoc* Mann-  
195 Whitney U test). Next, we assessed NK cell degranulation activity (CD107a upregulation) when  
196 vaccine-elicited antibodies are incubated with HCMV-infected cells (**Figure 5F**), which we  
197 previously identified to approximate antibody-dependent cellular cytotoxicity (ADCC) for rabbits  
198 [17]. However, we were unable to measure NK degranulation activity for the majority of animals,  
199 suggesting that antibodies mediating this non-neutralizing effector function are not a dominant  
200 response elicited by gB FL, gB ecto, or gB mRNA vaccines.

201

#### 202 *gB non-ectodomain-directed antibodies can mediate whole HCMV virion phagocytosis*

203 We depleted gB ectodomain-specific IgG from vaccinated rabbit sera, and depletion was  
204 confirmed by ELISA against the same protein (**Figure 6A**). Furthermore, we established that AD-  
205 3-specific antibodies remained in gB ectodomain-depleted sera of gB FL vaccinees by measuring  
206 responses to an immunodominant AD-3 peptide (**Figure 6B**). Interestingly, ectodomain-depleted  
207 rabbit sera was able to mediate low-level HCMV virion phagocytosis (**Figure 6C**) (gB FL median  
208 % phagocytosing cells: preimmune = 0.96%, mock depleted = 2.91%, gB ecto depleted = 1.93%),  
209 suggesting that non-ectodomain epitopes (e.g. AD-3 or MPER) can be bound by circulating IgG  
210 that can subsequently mediate non-neutralizing effector functions. Furthermore, the magnitude of  
211 vaccine-elicited binding to AD-3 linear peptides of non-depleted plasma correlated strongly with  
212 phagocytosis mediated by gB ectodomain-depleted serum antibodies (**Figure 6D**;  $r = 0.75$ ,  
213  $p < 0.001$ , Spearman-rank correlation).

214

#### 215 *gB-specific T cell responses*

216 Lastly, we investigated the magnitude of antigen-specific T cells by intracellular cytokine  
217 staining. Purified spleen mononuclear cells were either not stimulated, incubated with mitogen

218 concanavalin A (ConA), or incubated with pooled gB peptides. Subsequently, the concentration  
219 of IFN $\gamma$ <sup>+</sup> live T cells identified for each group/treatment (**Figure 7A**). For animals from each  
220 vaccine group, ConA nonspecifically stimulated a population of T cells to produce IFN $\gamma$ <sup>+</sup> (all  
221  $p < 0.05$ , Friedman test + *post hoc* Wilcoxon matched pairs signed-rank test). When the percentage  
222 of unstimulated IFN $\gamma$ <sup>+</sup> T cells is subtracted from that of gB-stimulated IFN $\gamma$ <sup>+</sup> T cells (**Figure 7B**),  
223 we observed a modest gB-specific T cell response that is most pronounced in gB FL and gB  
224 mRNA vaccinated rabbits (median % gB-specific IFN $\gamma$ <sup>+</sup> T cells: FL = 0.22%, ecto = 0%, mRNA =  
225 0.38%,  $p = \text{ns}$ , Kruskal-Wallis). In addition to spleen cells, we attempted to identify antigen-specific  
226 T cells in peripheral blood as well as mesenteric lymph nodes, but no IFN $\gamma$ <sup>+</sup> cells were observed  
227 using this method upon either ConA or gB peptide stimulation.

228 **Discussion:**

229 Glycoprotein B, a homotrimeric viral fusogen that is essential for entry into all cell types,  
230 has long been a leading HCMV vaccine candidate [9]. Yet over the past decade, following  
231 discovery that the most potent HCMV-neutralizing antibodies in human sera target the  
232 gH/gL/UL128-131A pentameric complex [22, 23], the focus has expanded from gB vaccine  
233 development. Nevertheless, it is important to recognize that the gB/MF59 protein subunit vaccine  
234 achieved partial moderate vaccine efficacy in preventing primary HCMV infection and  
235 seroconversion [12, 13] – a feat unparalleled in the HCMV vaccine field [24]. Furthermore, the  
236 gB/MF59 vaccine reduced viremia and demonstrated a protective benefit in transplant recipients  
237 [14]. Importantly, these partial successes were achieved without the elicitation of robust  
238 neutralizing antibody responses [16, 25]. In this investigation we sought to improve upon the gB  
239 immunogen antigenicity and vaccine/delivery platform, comparing novel vaccine immunogenicity  
240 head-to-head against the gB/MF59 vaccine in a preclinical model.

241 HCMV preclinical vaccine development is hindered by the fact that small animal models  
242 poorly represent host-pathogen biology and mechanisms of disease pathogenesis [26, 27]. We  
243 chose to test immunogenicity in rabbits because we previously demonstrated that vaccination can  
244 elicit antibodies with both neutralizing and non-neutralizing *in vitro* functionality [17]. In this study  
245 we were able to epitope-map and define the function of antibodies elicited by these three  
246 experimental vaccines, then compare to previously-reported immune correlates of protection  
247 (Nelson, *Journal of Infectious Diseases*, 2019, in press). HCMV-neutralizing IgG has previously  
248 been associated with reduced viral systemic dissemination [20, 28, 29]. Specifically, antibodies  
249 targeting gB AD-2 are correlated with reduced incidence of viremia and congenital disease [19,  
250 20], though AD-2-specific antibodies were not elicited to any appreciable extent by the vaccines  
251 tested in this investigation (**Figure 4H**). Furthermore, non-neutralizing antibodies targeting gB and  
252 other surface glycoproteins are well described to have a protective role in preventing HCMV  
253 acquisition [16, 25], reducing viremia [16, 30], and blocking tissue-invasive replication [30, 31],

254 though the precise mechanism remains unknown. Lastly, HCMV-specific CD4<sup>+</sup> and CD8<sup>+</sup> T cells  
255 have been widely implicated in reducing HCMV acquisition [32, 33], viral replication [26, 34-42],  
256 and the incidence of congenital/transplant-associated disease [43, 44].

257         Given the uncertainty regarding precise epitope specificities or immune effector functions  
258 protective against HCMV-associated disease, we regarded enhanced *durability* and *breadth* of  
259 immune responses as desirable attributes for vaccine development and the primary outcomes of  
260 interest in this study. Overall, we identified that the experimental vaccines (gB FL, gB ecto, and  
261 gB mRNA) elicited comparable magnitude binding and functional antibody responses at peak  
262 immunogenicity. Most distinction between vaccine-elicited immunogenicity was observed only at  
263 the latest timepoint (20 weeks – 12 weeks after final vaccine dose), signifying variable durability  
264 of elicited antibody responses. Nucleoside-modified mRNA-LNP vaccines have been well-  
265 described to produce sustained antigen presentation with robust T follicular helper cell and  
266 germinal center B cell stimulation, resulting in extraordinarily durable antibody responses after  
267 even a single vaccine dose in small and large animals [21, 45-47]. Indeed, we identified that the  
268 durability of gB mRNA vaccine-elicited responses exceeded that of gB FL for nearly all measured  
269 antibody binding/functional responses (**Table 1**; comparison statistically significant for: soluble  
270 and cell-associated gB binding, binding to gB domain 1 and domain 1+2, heterologous virus  
271 neutralization, and engagement of F<sub>c</sub>γRIIIa). Furthermore, we noted enhanced breadth of the  
272 peptide-binding immune response in gB mRNA-immunized rabbits, resulting in the targeting of  
273 unconventional/sub-dominant epitopes that are not observed in protein subunit vaccinees (**Figure**  
274 **3, Figure S1**). mRNA-vaccinated rabbits appear to have a gB peptide-binding fingerprint that  
275 closely resembles that in seropositive individuals elicited by natural host infection [25].  
276 Importantly, while HCMV gB mRNA vaccines have been tested previously in a preclinical model  
277 [48], this is the first such investigation to test a gB mRNA-based vaccine alongside the partially-  
278 effective gB/MF59 protein subunit vaccination and to directly compare the epitope specificity,

279 durability, and neutralizing/non-neutralizing function of antibodies elicited by these two vaccine  
280 platforms.

281 In this investigation, we specifically focused on the implications of the gB/MF59-elicited  
282 immune-dominant response directed against gB AD-3 [25]. We hypothesized the absence of  
283 neutralizing antibodies in gB/MF59 vaccinees may be attributable to the dominant responses  
284 against the AD-3 'decoy epitope', which diverted antibody targeting away from 'more functional'  
285 epitopes [24]. We directly tested this hypothesis with our gB ecto group by excluding AD-3 from  
286 the immunogen. Intriguingly, we failed to see any consistent increase in the magnitude of  
287 functional neutralizing/non-neutralizing antibodies in gB ecto vaccinated rabbits, suggesting that  
288 inclusion of the AD-3 epitope in the vaccine immunogen does not hinder the development of more  
289 functional antibodies. Is it therefore possible that AD-3 directed antibodies have any functional or  
290 protective role that might account for the 50% vaccine efficacy observed in gB/MF59 vaccinees?  
291 In this study we noted that AD-3-specific antibodies can mediate non-neutralizing antibody  
292 effector functions including whole virion phagocytosis (**Figure 6**). Consequently, the high-  
293 magnitude AD-3 response in gB FL-vaccinated rabbits likely accounts for our observation of  
294 robust and durable phagocytosis activity in these animals (**Figure 5E**).

295 A limitation to this study is dissimilarity in vaccine dose and route of delivery between  
296 comparison groups. Protein subunit vaccines (gB FL, gB ecto) were given I.M. at a dose of 20 $\mu$ g,  
297 mimicking the protocol for gB/MF59 immunized humans in the partially-efficacious clinical trials  
298 [12, 13, 24]. In contrast, 50 $\mu$ g of the gB nucleoside-modified mRNA-LNP was administered I.D,  
299 which was selected because this delivery method enhances protein expression *in vivo* [49].  
300 Depending on the antigen and vaccine formulation, intradermal vaccination may be as much as  
301 10 times more potent than intramuscular dosing [50]. Therefore, we cannot rule out the possibility  
302 that our results of enhanced breadth and durability in gB mRNA-immunized rabbits are  
303 dose/method dependent – that a higher dose or different delivery method of gB FL protein might  
304 not have achieved similar results to gB mRNA-LNP vaccinated rabbits. Furthermore, while rabbits

305 provide an excellent model to study vaccine immunogenicity, this investigation was restricted by  
306 the rabbit immunologic toolbox. We were able to measure F<sub>c</sub>γ receptor engagement in this study,  
307 though lacked the ability to identify the mechanism behind variable F<sub>c</sub>γ receptor engagement (e.g.  
308 IgG subclass or F<sub>c</sub> glycosylation). Furthermore, while we were able to identify gB-specific T cells  
309 in spleen, we were unable to: 1) identify antigen-specific T cells in peripheral blood, and 2) parse  
310 out T cell subsets (CD4<sup>+</sup>, CD8<sup>+</sup>, etc). Nevertheless, the results described are sufficient justification  
311 for subsequent testing of the gB mRNA-LNP vaccine in nonhuman primate preclinical challenge  
312 models and/or human clinical trials.

313         This comparison of immune responses elicited by next-generation HCMV vaccines, head-  
314 to-head against gB/MF59 immunization (gB FL), provides a basis for rational gB vaccine  
315 development efforts. First, we have demonstrated that gB nucleoside-modified mRNA-LNP  
316 immunization improves the durability of gB-binding and functional antibody responses and  
317 enhances the breadth of the gB-specific antibody repertoire. Additionally, we note that gB  
318 ectodomain immunization did not elicit antibody responses that were functionally superior to gB  
319 FL, suggesting that the immunodominant AD-3 response does not interfere with the development  
320 of functional antibodies. While we await well-validated immune correlates of protection to inform  
321 HCMV vaccine development efforts, the gB mRNA-LNP vaccine clearly had enhanced long-term  
322 immunogenicity and response breadth compared with gB FL and gB ecto vaccines. Therefore,  
323 we propose subsequent testing of this vaccine platform in nonhuman primate challenge models  
324 as well as human immunogenicity trials to rigorously interrogate its ability to elicit immune factors  
325 protective against congenital HCMV infection and transplant-associated disease.

326 **Methods:**

327 *gB ectodomain immunogen production.* The sequence encoding the ectodomain segment (amino  
328 acid residues 1-696) of Towne strain (GenBank accessioning# FJ616285.1) HCMV glycoprotein  
329 B (gB) was tagged at the 3' end with a polyhistidine tag, and the furin cleavage site at residue 457  
330 mutated from 'RTKR' to 'STKS'. The nucleotide sequence was codon-optimized for mammalian  
331 cells, then cloned into pcDNA3.1(+) mammalian expression vector (Invitrogen) via *BamHI* site at  
332 the 5' end and *EcoRI* site at the 3' end. Subsequently, the plasmid was transiently transfected  
333 into Expi293i cells using ExpiFectamine 293 transfection reagents (ThermoFisher Scientific)  
334 according to the manufacturer's instructions. Culture supernatant was harvested after 5 days of  
335 incubation at 37 °C and 8% CO<sub>2</sub>, then purified using Nickel-NTA resin (ThermoFisher Scientific).  
336 Purity, identity, and correct molecular weight were confirmed by Western blot using monoclonal  
337 antibodies specific for gB AD-2, gB domain 1, and gB domain 2 (described in [15]), followed AP-  
338 conjugated anti-human IgG (Sigma-Aldrich). Finally, the protein was tested for the presence of  
339 endotoxin using the Pierce LAL chromogenic endotoxin quantitation kit (ThermoFisher Scientific).  
340 gB protein ectodomain aliquots were stored at -80°C at a concentration of ~1 µg/µl, then thawed  
341 <60 minutes prior to injection.

342  
343 *gB mRNA production and formulation into lipid nanoparticles.* The modified mRNA encoding  
344 HCMV gB (Towne strain, GenBank accessioning# FJ616285.1) was produced as previously  
345 described [51] using T7 RNA polymerase (Megascript, Ambion) on codon-optimized [52]  
346 linearized plasmid (sequence is available upon request). The mRNA was transcribed to contain  
347 101 nucleotide-long poly(A) tail. To generate modified nucleoside-containing mRNA, m<sup>1</sup>Ψ-5'-  
348 triphosphate (TriLink) was used instead of UTP. The mRNA was then capped using the m7G  
349 capping kit with 2'-O-methyltransferase (ScriptCap, CellScript). The mRNA was purified by Fast  
350 Protein Liquid Chromatography (FPLC) (Akta Purifier, GE Healthcare), as described [53] and  
351 analyzed by electrophoresis using denaturing or native agarose gels, and stored at -20 °C. The

352 FPLC-purified m1Ψ-containing HCMV gB mRNA and poly(C) RNA (Sigma) were encapsulated in  
353 LNPs using a self-assembly process in which an aqueous solution of mRNA at pH=4.0 is rapidly  
354 mixed with a solution of lipids dissolved in ethanol [54]. LNPs used in this study were similar in  
355 composition to those described previously [54, 55], which contain an ionizable cationic lipid  
356 (proprietary to Acuitas)/phosphatidylcholine/cholesterol/PEG-lipid (50:10:38.5:1.5 mol/mol) and  
357 were encapsulated at an RNA to total lipid ratio of ~0.05 (wt/wt). They had a diameter of ~80 nm  
358 as measured by dynamic light scattering using a Zetasizer Nano ZS (Malvern Instruments Ltd)  
359 instrument. mRNA-LNP formulations were stored at -80°C at a concentration of mRNA of ~1 µg/µl,  
360 then thawed <60 minutes prior to injection.

361  
362 *Animal care and sample collection.* Juvenile New Zealand White rabbits (approximately 10 weeks  
363 of age), were purchased from Robinson Services Inc (Mocksville, NC) and housed at Duke  
364 University. For blood collections, animals were sedated with 1mg/kg subcutaneous acepromazine  
365 and topical 1% lidocaine applied to the ears. EDTA-anticoagulated blood was collected via  
366 auricular venipuncture. Plasma was separated from whole blood by centrifugation, and PBMCs  
367 were isolated by density gradient centrifugation using Lympholyte cell separation media  
368 (Cedarlane laboratories). Animals were euthanized using 0.5mL of subcutaneously-injected  
369 xylazine (100mg/mL) + ketamine (500mg/mL) mixed together in a 1:5 ratio, followed by 0.5mL of  
370 intracardiac Euthasol (pentobarbital sodium + phenytoin sodium). Lymphocytes were isolated  
371 from spleen and mesenteric lymph nodes by manual tissue disruption and crushing through a  
372 100µm cell strainer, followed by density gradient centrifugation with Lympholyte cell separation  
373 media.

374  
375 *Animal vaccination.* Three groups of juvenile New Zealand White rabbits (n=6) were given  
376 different vaccines: 1) 50µg intramuscular full-length gB protein (generous gift of Sanofi Pasteur)  
377 combined 1:1 v/v with MF59-like squalene adjuvant AddaVax (Invivogen), 2) 50µg intramuscular



378 gB ectodomain protein combined 1:1 v/v with AddaVax, or 3) 50µg intradermal nucleoside-  
379 modified gB mRNA packaged in lipid nanoparticles. Vaccine doses were administered monthly  
380 for three consecutive months. For intramuscular (I.M.) protein subunit vaccine administration,  
381 rabbits were sedated with 1mg/kg subcutaneous acepromazine then injected with the vaccine  
382 dose in the rear thigh (alternating sides between monthly doses). For intradermal (I.D.) mRNA-  
383 LNP vaccine administration, rabbits were sedated with 1mg/kg subcutaneous acepromazine as  
384 well as 2% inhaled isoflurane, and the saddle of the rabbit shaved. Chilled, sterile PBS was  
385 added to each vaccine dose to a total volume of 300 µL, the diluted vaccine divided into 6 equal  
386 fractions of 50µL each, then the rabbit saddle was injected intradermally with 3 injections on each  
387 side of the spine (injection sites varied between monthly doses).

388

389 *Cell culture.* Human retinal pigment epithelial (ARPE-19) cells (ATCC) were maintained for a  
390 maximum of 35 passages in Dulbecco's modified Eagle medium-12 (DMEM-F12) supplemented  
391 with 10% FCS, 2mM L-glutamine, 1mM sodium pyruvate, 50 U/mL penicillin, 50 µg/mL  
392 streptomycin and gentamicin, and 1% epithelial growth cell supplement (ScienCell). Human lung  
393 (MRC-5) fibroblasts (ATCC) were maintained for a maximum of 20 passages in DMEM containing  
394 20% FCS, 50 U/mL penicillin, and 50 µg/mL streptomycin. Human epithelial kidney (HEK293T)  
395 cells (ATCC) were maintained for a maximum of 35 passages in DMEM containing 10% FCS,  
396 25mM HEPES buffer, 50 U/mL penicillin, and 50 µg/mL streptomycin. Human monocyte (THP-1)  
397 cells (ATCC) were maintained for a maximum of 35 passages in RPMI-1640 medium containing  
398 10% FCS. All cell lines were tested for the presence of mycoplasma biannually.

399

400 *Virus growth.* AD169 revertant virus (AD169r; a gift from Merck) [56], and BADUL131a virus [57]  
401 stocks were propagated on ARPE cells in T75 culture flasks. Towne virus (ATCC) was  
402 propagated on MRC-5 cells in T75 culture flasks. Supernatant containing cell-free virus was  
403 collected when 90% of cells showed cytopathic effects, then cleared of cell debris by low-speed

404 centrifugation before passage through a 0.45- $\mu$ m filter. Viral infections of ARPE-19 cells were  
405 carried out in similar media but contained only 5% FCS and lacking cell growth supplement.  
406  
407 *Binding antibody multiplex assay (BAMA)*. Antibody responses against gB full-length protein, gB  
408 ectodomain, and gB epitopes (creation described in [14, 20]) were assessed by multiplex ELISA.  
409 In brief, carboxylated fluorescent beads (Luminex) were covalently coupled to purified HCMV  
410 antigens and subsequently incubated with maternal plasma in assay diluent (phosphate-buffered  
411 saline, 5% normal goat serum, 0.05% Tween 20, and 1% Blotto milk, 0.5% polyvinyl alcohol, and  
412 0.8% polyvinylpyrrolidone). The antigen panel included full-length gB (courtesy of Sanofi-  
413 Pasteur), gB ectodomain protein, gB domain 1, gB domain 2, gB domain 1+2, gB AD-1  
414 (myBiosource), and biotinylated linear gB AD-2 (biotin-NETIYNTTLKYGD). HCMV glycoprotein-  
415 specific antibodies were detected with phycoerythrin-conjugated goat anti-human IgG (2  $\mu$ g/mL,  
416 Southern Biotech). Beads were washed and acquired on a Bio-Plex 200 instrument (Bio-Rad),  
417 and results were expressed as mean fluorescence intensity. A panel of pre-vaccination time  
418 points was tested to determine nonspecific baseline levels of binding. Minimal background activity  
419 was observed, so the threshold for positivity for each antigen was set at the mean value of  
420 negative control sera to each antigen + 3 standard deviations. Blank beads were used in all  
421 assays to account for nonspecific binding. All assays included tracking of HCMV immunoglobulin  
422 (Cytogam – CSL Behring) standard by Levy-Jennings charts. The preset assay criteria for sample  
423 reporting were coefficient of variation per duplicate values of  $\leq 20\%$  for each sample and  $\geq 100$   
424 beads counted per sample. All samples were analyzed at the same dilution for each antigen: full-  
425 length gB, gB ectodomain, gB domain 1, gB domain 2, and gB domain 1+2 were assessed at a  
426 1:500 dilution; gB AD-1 and gB AD-2 were assessed at a 1:50 dilution. These dilutions were  
427 predetermined to be within the linear range of the assay based on testing serial dilutions of a  
428 small subset of plasma samples.  
429

430 *F<sub>c</sub>γ receptor engagement.* The binding of vaccine-elicited serum antibodies to F<sub>c</sub>γ receptors was  
431 characterized using a multiplex F<sub>c</sub>γ receptor BAMA assay, employing the reagents and QC  
432 methods described above. In brief, HCMV gB (full-length) was covalently coupled to streptavidin  
433 (Rockland)-coupled fluorescent beads (Luminex). Sera samples were diluted 1:500, then  
434 incubated in duplicate in a 96-well microplate with gB-streptavidin-coupled beads, then washed  
435 and incubated with one of the following biotinylated F<sub>c</sub>γ receptor tetramers: F<sub>c</sub>γRIa, F<sub>c</sub>γRIIa (clone  
436 H131), F<sub>c</sub>γRIIb, and F<sub>c</sub>γRIIIa (clone V158) (F<sub>c</sub>γ receptor proteins courtesy of Dr. Kevin Saunders).  
437 F<sub>c</sub>γ receptor engagement was detected using mouse anti-human IgG-PE (myBioSource) followed  
438 by a final wash. Data were acquired on a BioPlex-200 (Luminex).

439  
440 *gB-transfected cell binding.* Binding of vaccine-elicited antibodies to trimeric gB expressed on cell  
441 membranes was assessed by flow cytometry as previously [15]. Briefly, HEK293T cells were  
442 grown overnight to ~50% confluency, then co-transfected using Effectine transfection reagent  
443 (Qiagen) with a GFP-expressing plasmid (gift of Maria Blasi, Duke University) and a second  
444 plasmid encoding the full-length Towne strain gB (SinoBiological). Transfected cells were  
445 incubated for 2 days at 37°C and 5% CO<sub>2</sub>, washed with DPBS (Gibco), then removed from the  
446 flask using enzyme free cell-dissociation buffer (ThermoFisher Scientific). Cells were washed in  
447 wash buffer (DPBS + 1% FBS), then 100,000 live cells were added to each well of a 96-well V-  
448 bottom plate (Corning). After centrifugation (1200 x g, 5 minutes), cells were re-suspended in  
449 1:6250 diluted sera samples and incubated for 2 hours at 37°C and 5% CO<sub>2</sub>. Next, cells were  
450 washed and stained with LIVE/DEAD Aqua Dead Cell Stain Kit (ThermoFisher Scientific) diluted  
451 1:1000 for 20 minutes at RT. Afterwards, cells were washed, then re-suspended in PE-conjugated  
452 goat anti-human IgG Fc (eBioscience) diluted 1:200 in wash buffer then incubated for 25 minutes  
453 at 4°C. Following two additional wash steps, cells were re-suspended and fixed in DPBS + 1%  
454 formalin. Events were acquired on LSR Fortessa machine (BD biosciences) using the high-  
455 throughput sampler (HTS). The % PE+ cells was calculated from the live, GFP+ cell population

456 and reported for each sample. Background binding of each plasma sample was corrected for  
457 using cells transfected with the GFP-expressing plasmid alone.

458

459 *Avidity ELISA.* 384-well ELISA plates (Corning) were coated overnight at 4°C with 30 ng full-  
460 length gB per well, then blocked with assay diluent (1x PBS containing 4% whey, 15% normal  
461 goat serum, and 0.5% Tween-20). Three-fold dilutions of sera were then added to the plate, , then  
462 duplicate wells were treated for 5 min with either 7M urea or 1x PBS following sera incubation.  
463 Finally, bound IgG was detected with a horseradish peroxidase (HRP)-conjugated polyclonal goat  
464 anti-monkey IgG (Rockland), and developed using the SureBlue Reserve tetramethylbenzidine  
465 (TMB) peroxidase substrate (KPL). Sera dilutions that resulted in an OD value between 0.6 and  
466 1.2 in the absence of urea treatment (dilution range = 1:30-1:1000) were used to determine the  
467 relative avidity index (RAI). Indexes were calculated as the OD ratio of urea:PBS treated wells.

468

469 *Glycoprotein B peptide microarray.* Binding to gB linear peptides was assessed as previously [15].  
470 In brief, 15-mer peptides covering the entire gB open reading frame (Towne strain), and  
471 overlapping with neighboring peptides by 10 residues (total of 188 peptides) were synthesized  
472 and printed to a PepStar multiwell array (JPT Peptide) in triplicate. Microarray binding was  
473 performed manually using individual slides immobilized in the ArraySlide 24-4 chamber (JPT  
474 Peptide). First, arrays were blocked with blocking buffer (PBS containing 1% milk blotto, 5% NGS,  
475 and 0.05% Tween20), incubated first with sera diluted 1:250 in blocking buffer, and secondly with  
476 anti-human IgG conjugated to AF647 (Jackson ImmunoResearch) diluted in blocking buffer (0.75  
477 µg/mL). Arrays were washed in wash buffer (1x TBS buffer + 0.1% Tween) between steps using  
478 an automated plate washer (BioTec ELX50). To measure fluorescence, arrays were scanned at  
479 a wavelength of 635 nm using an InnoScan 710 device (Innopsys) at a PMT setting of 580 and  
480 100% laser power. Images were analyzed using Mapix software (Innopsys), and reviewed  
481 manually for accurate automated peptide identification. Binding intensity of sera to each peptide

482 was corrected with the surrounding background fluorescence. Median fluorescent intensity of  
483 each of the 3 replicates was reported.

484

485 *Neutralization.* The neutralization titers of patient sera were measured by both a high-throughput  
486 immunofluorescence assay as previously described [15]. Briefly, MRC-5 cells were seeded into  
487 96-well flat-bottom plates and incubated for 2 days at 37°C and 5% CO<sub>2</sub> to achieve 100%  
488 confluency. Once confluent, 3-fold dilutions (1:10–1:30,000) of heat-inactivated rabbit sera in  
489 infection media were incubated with an MOI=1.0 of Towne (ATCC) or AD169r (Merck  
490 Laboratories) virus stock in a total volume of 50 µL for 45 minutes at 37°C. For complement  
491 neutralization assays, plasma/virus was diluted in infection media containing rabbit complement  
492 (Cedarlane Laboratories) at a final dilution of 1:4. Immune complexes were added in duplicate to  
493 wells containing MRC-5 cells, then subsequently incubated for 18 hours at 37°C. Infected cells  
494 were then fixed for 10 minutes with 3.7% paraformaldehyde, permeabilized for 10 minutes with  
495 Triton × 100, and subsequently processed for immunofluorescence with mouse anti-HCMV IE-1  
496 monoclonal antibody (MAB810, Millipore) followed by goat anti-mouse IgG-AlexaFluor488  
497 (Millipore) and DAPI nuclear stain. Total cells and AF488+ infected cells per well were counted  
498 on a Cellomics Arrayscan (ThermoFisher Scientific). Neutralization titers (ID<sub>50</sub>) were calculated  
499 according to the method of Reed and Muench using the plasma dilution that resulted in a 50%  
500 reduction in the percentage of infected cells compared to control wells infected with virus only.

501

502 *Whole HCMV virion phagocytosis.* The ability of vaccine-elicited antibodies to facilitate  
503 phagocytosis of whole HCMV virions was assessed as previously [15]. Briefly, 10<sup>7</sup> PFU of  
504 concentrated, sucrose gradient-purified HCMV TB40/E-mCherry virus was buffer exchanged with  
505 1x PBS and sodium bicarbonate (0.1M final concentration), then AF647 NHS ester (Invitrogen)  
506 added for direct viral conjugation at room temperature for 1 hour with constant agitation. The  
507 reaction was quenched with 1 M Tris-HCl, pH 8.0, then the labelled virus was diluted 25x in wash

508 buffer (PBS + 0.1% FBS). Sera samples were diluted 1:10 in wash buffer, then 10  $\mu$ L of diluted  
509 sera combined with 10  $\mu$ L of diluted, fluorophore-conjugated virus in a round-bottom, 96-well plate  
510 (Corning) and allowed to incubate at 37°C for 2 hours. Following this incubation step, 25,000  
511 THP-1 cells were added to each well, suspended in 200  $\mu$ L primary growth media. Plates were  
512 centrifuged at 1200  $xg$  and 4°C for 1 hour in a spinoculation step, then incubated at 37°C for an  
513 additional hour. Cells were re-suspended and transferred to a 96-well V-bottom plate, then  
514 washed twice prior to fixing in 100 $\mu$ L DPBS + 1% formalin. Events were acquired on LSR Fortessa  
515 machine (BD biosciences) using the HTS. The % AF647+ cells was calculated from the full THP-1  
516 cell population and reported for each sample. A cutoff for sample positivity was defined as the  
517 mean value of pre-vaccination sera (n=18) + 2 standard deviations.

518

519 *Natural killer (NK) cell CD107a degranulation assay.* Cell-surface expression of CD107a was  
520 used as a marker for NK cell degranulation, which we have previously shown to have good  
521 agreement with antibody-dependent cellular cytotoxicity activity for rabbit sera [17]. MRC-5 cells  
522 were infected with BadrUL131-Y4 with a MOI of 1.0 for 48 hours at 37°C, at  $4 \times 10^4$  cells/well in 96-  
523 well flat-bottom tissue culture plates. Following incubation, supernatant was removed and the  
524 infected cell monolayers were washed once with RPMI 1640 containing 10% FBS, HEPES, Pen-  
525 Strep-L-Glut, Gentamicin (R10 media) before addition of NK cells. Primary human NK cells were  
526 isolated from peripheral blood mononuclear cells (PBMC) after overnight rest in R10 media with  
527 10ng/mL IL-15 (Miltenyi Biotech) by depletion of magnetically labeled cells (Human NK cell  
528 isolation kit, Miltenyi Biotech).  $5 \times 10^4$  live NK cells were added to each well containing HCMV-  
529 infected MRC-5 cell monolayers. Plasma samples were diluted in R10 and added to the cells at  
530 a final dilution of 1:50 in duplicate. Brefeldin A (GolgiPlug, 1  $\mu$ l/ml, BD Biosciences), monensin  
531 (GolgiStop, 4 $\mu$ l/6mL, BD Biosciences), and CD107a-FITC (BD Biosciences, clone H4A3) were  
532 added to each well and the plates were incubated for 6 hours at 37°C in a humidified 5% CO<sub>2</sub>  
533 incubator. NK cells were then gently resuspended, taking care not to disturb the MRC-5 cell

534 monolayer, and the NK containing supernatant was collected and transferred to 96-well V-bottom  
535 plates. The recovered NK cells were washed with PBS, and stained with LIVE/DEAD Aqua Dead  
536 Cell Stain at a 1:1000 dilution for 20 minutes at room temperature. The cells were then washed  
537 with 1%FBS PBS and stained for 20 minutes at room temperature with the following panel of  
538 fluorescently conjugated antibodies diluted in 1%FBS PBS: CD56-PECy7 (BD Biosciences, clone  
539 NCAM16.2), CD16-PacBlue (BD Biosciences, clone 3G8), and CD69-BV785 (BioLegend, Clone  
540 FN50). The cells were then washed twice and re-suspended in 1% paraformaldehyde fixative for  
541 flow cytometric analysis. Data analysis was performed using FlowJo software (v9.9.6). Data is  
542 reported as the % of CD107a positive live NK cells (singlets, lymphocytes, aqua blue<sup>-</sup>, CD56<sup>+</sup>  
543 and/or CD16<sup>+</sup>, CD107a<sup>+</sup>). CD69 was not used in the final analysis due to the low frequency of  
544 CD107a<sup>+</sup> responses. Parallel assays were performed with uninfected MRC-5 cells as a control  
545 for identification of non-CMV specific responses, and final data are presented after subtraction of  
546 background activity observed against uninfected cells.

547

548 *Soluble protein bead coupling and antibody depletion.* Cyanogen bromide-activated (CNBr-  
549 activated) sepharose beads (GE Healthcare) were rehydrated with 1 mM HCl then suspended in  
550 coupling buffer (0.1 M NaHCO<sub>3</sub> + 0.5 M NaCl, pH 8.3). Every 100 µL of bead slurry was combined  
551 with 200 µg of soluble gB ectodomain (post-fusion conformation, courtesy of Jason McLellan,  
552 University of Texas, Austin). Coupling proceeded for 12 hours at 4°C on an inversion rotator.  
553 Excess soluble protein was washed off with 5 column volumes of coupling buffer. Unbound CNBr  
554 active groups were blocked with quenching buffer (0.1 M Tris HCl pH 8.0) for 2 hours at room  
555 temperature. Protein conjugated beads were washed with 3 cycles of alternating pH 0.1 M acetic  
556 acid, pH 4.0 and 0.1 M Tris HCl pH 8. For depletion of gB post fusion specific antibodies, 100 µg  
557 of protein-coupled bead slurry was loaded into a spin microelution column (Pierce, TFS). 400 µL  
558 of filtered (SpinX) 1:50 diluted plasma from vaccinated rabbits was then added to each column.

559 Plasma was centrifuged through the column 10 times with bound IgG elution (0.2 M glycine elution  
560 buffer, pH 2.5) and bead recalibration (3 cycles of alternating pH washes) after spins 5 and 10.  
561 Adequate specific depletion was confirmed by ELISA against the depleted protein. Mock depleted  
562 samples underwent an identical depletion procedure in the presence of HIV-1 gp120 conjugated  
563 CNBr beads.

564

565 *Splenic T cell intracellular cytokine staining.* Primary spleen cells were thawed in RPMI + 10%  
566 FBS with benzonase (50 U/mL) then measured for count and viability on Muse Cell Counter  
567 (Luminex). Cells were coincubated in duplicate with Con A (5ug/mL), HCMV UL155 (250ng/mL.  
568 JPT), or media for 20-24 hours at 37 degrees C. Samples were stained for rabbit pan-T cell marker  
569 KEN-5 (SCBT) and live/dead (Invitrogen), then fixed and permeabilized using BD  
570 Cytofix/Cytoperm according to the manufacturer's instructions. Cells were stained for rabbit IFN-  
571  $\gamma$  (mAb Tech). Flow cytometry was performed on a BD LSR II, and data was analyzed in Flow Jo  
572 v10. Gating strategy shown in **Figure S4**.

573

574 *Statistical analysis.* Nonparametric tests were utilized because of the small group sizes (n=6 per  
575 group). Furthermore, the 20 week timepoint was employed for all statistical comparisons between  
576 vaccination groups. Magnitude of immune responses between the 3 vaccine groups were  
577 compared first by Kruskal-Wallis test. If  $p < 0.05$ , *post hoc* Mann-Whitney U test was conducted for  
578 gB ecto and gB mRNA compared with gB FL. All statistical tests were carried out using the R  
579 statistical interface (version 3.3.1, [www.r-project.org](http://www.r-project.org)) and were two-tailed.

580

581 *Ethics statement.* Animals were maintained in accordance with the American Association for  
582 Accreditation of Laboratory Animal Care standards and *The Guide for the Care and Use of*  
583 *Laboratory Animals* [58]. Efforts were made to minimize stress and provide enrichment  
584 opportunities when possible (social housing when possible, objects to manipulate in cage, varied



585 food supplements, interaction with caregivers and research staff). All protocols were reviewed  
586 and approved by the Duke University Animal Care and Use Committee (IACUC) prior to the  
587 initiation of the study (protocol #A314-15-12).

588 **Author contributions:**

589 C.S.N. and S.R.P. designed research; C.S.N., J.A.J., N.P., H.R., M.G., and W.E. performed  
590 research; C.S.N. analyzed data; D.W., J.M., and J.P. contributed reagents and expertise; C.S.N.  
591 and S.R.P. wrote the paper.

592 **Acknowledgements:**

593           The authors would like to thank Diego Zapata and the Duke Division of Laboratory and  
594 Animal Resources for assistance with rabbit handling. Furthermore, we acknowledge Sanofi-  
595 Pasteur, Merck, and Trellis Biosciences for the generous gift of research materials. This work was  
596 supported by: NIH/NIAID R21 to S.R.P (R21AI136556) and NIH/NICHD F30 grant to C.S.N  
597 (F30HD089577). The funders had no role in study design, data collection and interpretation,  
598 decision to publish, or the preparation of this manuscript. The content is solely the responsibility  
599 of the authors and does not necessarily represent the official views of the National Institutes of  
600 Health.

601 **References:**

- 602
- 603 1. Swanson EC, Gillis P, Hernandez-Alvarado N, Fernandez-Alarcon C, Schmit M, Zabeli  
604 JC, et al. Comparison of monovalent glycoprotein B with bivalent gB/pp65 (GP83) vaccine for  
605 congenital cytomegalovirus infection in a guinea pig model: Inclusion of GP83 reduces gB  
606 antibody response but both vaccine approaches provide equivalent protection against pup  
607 mortality. *Vaccine*. 2015;33(32):4013-8. doi: 10.1016/j.vaccine.2015.06.019. PubMed PMID:  
608 26079615; PubMed Central PMCID: PMC4772145.
- 609 2. Manicklal S, Emery VC, Lazzarotto T, Boppana SB, Gupta RK. The "Silent" Global  
610 Burden of Congenital Cytomegalovirus. *Clinical Microbiology Reviews*. 2013;26(1):86-102. doi:  
611 10.1128/Cmr.00062-12. PubMed PMID: WOS:000313344900005.
- 612 3. Kenneson A, Cannon MJ. Review and meta-analysis of the epidemiology of congenital  
613 cytomegalovirus (CMV) infection. *Rev Med Virol*. 2007;17(4):253-76. doi: 10.1002/rmv.535.  
614 PubMed PMID: 17579921.
- 615 4. Ross SA, Boppana SB. Congenital cytomegalovirus infection: outcome and diagnosis.  
616 *Semin Pediatr Infect Dis*. 2005;16(1):44-9. doi: 10.1053/j.spid.2004.09.011. PubMed PMID:  
617 15685149.
- 618 5. Legendre C, Pascual M. Improving outcomes for solid-organ transplant recipients at risk  
619 from cytomegalovirus infection: late-onset disease and indirect consequences. *Clin Infect Dis*.  
620 2008;46(5):732-40. Epub 2008/01/29. doi: 10.1086/527397. PubMed PMID: 18220478.
- 621 6. Ljungman P, Griffiths P, Paya C. Definitions of cytomegalovirus infection and disease in  
622 transplant recipients. *Clin Infect Dis*. 2002;34(8):1094-7. Epub 2002/03/27. doi:  
623 10.1086/339329. PubMed PMID: 11914998.
- 624 7. Bialas KM, Permar SR. The March towards a Vaccine for Congenital CMV: Rationale  
625 and Models. *PLoS pathogens*. 2016;12(2):e1005355. doi: 10.1371/journal.ppat.1005355.  
626 PubMed PMID: 26866914; PubMed Central PMCID: PMC4750955.
- 627 8. Griffiths PD. Burden of disease associated with human cytomegalovirus and prospects  
628 for elimination by universal immunisation. *The Lancet Infectious diseases*. 2012;12(10):790-8.  
629 Epub 2012/09/29. doi: 10.1016/S1473-3099(12)70197-4. PubMed PMID: 23017365.
- 630 9. Schleiss MR. Recombinant cytomegalovirus glycoprotein B vaccine: Rethinking the  
631 immunological basis of protection. *Proceedings of the National Academy of Sciences of the*  
632 *United States of America*. 2018;115(24):6110-2. Epub 2018/06/08. doi:  
633 10.1073/pnas.1806420115. PubMed PMID: 29875141; PubMed Central PMCID:  
634 PMC6004476.
- 635 10. Vanarsdall AL, Johnson DC. Human cytomegalovirus entry into cells. *Curr Opin Virol*.  
636 2012;2(1):37-42. doi: 10.1016/j.coviro.2012.01.001. PubMed PMID: 22440964; PubMed Central  
637 PMCID: PMC3880194.
- 638 11. Zydek M, Pettitt M, Fang-Hoover J, Adler B, Kauvar LM, Pereira L, et al. HCMV infection  
639 of human trophoblast progenitor cells of the placenta is neutralized by a human monoclonal  
640 antibody to glycoprotein B and not by antibodies to the pentamer complex. *Viruses*.  
641 2014;6(3):1346-64. doi: 10.3390/v6031346. PubMed PMID: 24651029; PubMed Central  
642 PMCID: PMC3970154.
- 643 12. Pass RF, Zhang C, Evans A, Simpson T, Andrews W, Huang ML, et al. Vaccine  
644 prevention of maternal cytomegalovirus infection. *The New England journal of medicine*.  
645 2009;360(12):1191-9. doi: 10.1056/NEJMoa0804749. PubMed PMID: 19297572; PubMed  
646 Central PMCID: PMC2753425.
- 647 13. Bernstein DI, Munoz FM, Callahan ST, Rupp R, Wootton SH, Edwards KM, et al. Safety  
648 and efficacy of a cytomegalovirus glycoprotein B (gB) vaccine in adolescent girls: A randomized  
649 clinical trial. *Vaccine*. 2016;34(3):313-9. doi: 10.1016/j.vaccine.2015.11.056. PubMed PMID:  
650 26657184; PubMed Central PMCID: PMC4701617.

- 651 14. Griffiths PD, Stanton A, McCarrell E, Smith C, Osman M, Harber M, et al.  
652 Cytomegalovirus glycoprotein-B vaccine with MF59 adjuvant in transplant recipients: a phase 2  
653 randomised placebo-controlled trial. *Lancet*. 2011;377(9773):1256-63. Epub 2011/04/13. doi:  
654 10.1016/S0140-6736(11)60136-0. PubMed PMID: 21481708; PubMed Central PMCID:  
655 PMCPMC3075549.
- 656 15. Nelson CS, Huffman T, Jenks JA, Cisneros de la Rosa E, Xie G, Vandergrift N, et al.  
657 HCMV glycoprotein B subunit vaccine efficacy mediated by nonneutralizing antibody effector  
658 functions. *Proceedings of the National Academy of Sciences of the United States of America*.  
659 2018. Epub 2018/05/02. doi: 10.1073/pnas.1800177115. PubMed PMID: 29712861.
- 660 16. Baraniak I, Kropff B, Ambrose L, McIntosh M, McLean GR, Pichon S, et al. Protection  
661 from cytomegalovirus viremia following glycoprotein B vaccination is not dependent on  
662 neutralizing antibodies. *Proceedings of the National Academy of Sciences of the United States*  
663 *of America*. 2018;115(24):6273-8. Epub 2018/04/25. doi: 10.1073/pnas.1800224115. PubMed  
664 PMID: 29686064; PubMed Central PMCID: PMCPMC6004462.
- 665 17. Pollara J, Jones DI, Huffman T, Edwards RW, Dennis M, Li SH, et al. Bridging Vaccine-  
666 Induced HIV-1 Neutralizing and Effector Antibody Responses in Rabbit and Rhesus Macaque  
667 Animal Models. *Journal of virology*. 2019;93(10). Epub 2019/03/08. doi: 10.1128/JVI.02119-18.  
668 PubMed PMID: 30842326.
- 669 18. Nelson CS HT, Cisneros de la Rosa E, Xi G, Vandergrift N, Pass RF, Pollara J, Permar  
670 SR. HCMV glycoprotein B subunit vaccine efficacy was mediated by non-neutralizing antibody  
671 effector functions. *bioRxiv: preprint server for biology*. 2018. Epub 12 January 2018. doi:  
672 <https://doi.org/10.1101/246884>.
- 673 19. Baraniak I, Kropff B, McLean GR, Pichon S, Piras-Douce F, Milne RSB, et al. Epitope-  
674 Specific Humoral Responses to Human Cytomegalovirus Glycoprotein-B Vaccine With MF59:  
675 Anti-AD2 Levels Correlate With Protection From Viremia. *The Journal of infectious diseases*.  
676 2018;217(12):1907-17. Epub 2018/03/13. doi: 10.1093/infdis/jiy102. PubMed PMID: 29528415;  
677 PubMed Central PMCID: PMCPMC5972559.
- 678 20. Bialas KM, Westreich D, Cisneros de la Rosa E, Nelson CS, Kauvar LM, Fu TM, et al.  
679 Maternal Antibody Responses and Nonprimary Congenital Cytomegalovirus Infection of HIV-1-  
680 Exposed Infants. *The Journal of infectious diseases*. 2016;214(12):1916-23. Epub 2016/12/08.  
681 doi: 10.1093/infdis/jiw487. PubMed PMID: 27923951; PubMed Central PMCID:  
682 PMCPMC5142097.
- 683 21. Pardi N, Hogan MJ, Naradikian MS, Parkhouse K, Cain DW, Jones L, et al. Nucleoside-  
684 modified mRNA vaccines induce potent T follicular helper and germinal center B cell responses.  
685 *The Journal of experimental medicine*. 2018;215(6):1571-88. Epub 2018/05/10. doi:  
686 10.1084/jem.20171450. PubMed PMID: 29739835; PubMed Central PMCID:  
687 PMCPMC5987916.
- 688 22. Macagno A, Bernasconi NL, Vanzetta F, Dander E, Sarasini A, Revello MG, et al.  
689 Isolation of human monoclonal antibodies that potently neutralize human cytomegalovirus  
690 infection by targeting different epitopes on the gH/gL/UL128-131A complex. *Journal of virology*.  
691 2010;84(2):1005-13. doi: 10.1128/JVI.01809-09. PubMed PMID: 19889756; PubMed Central  
692 PMCID: PMCPMC2798344.
- 693 23. Fouts AE, Chan P, Stephan JP, Vandlen R, Feierbach B. Antibodies against the  
694 gH/gL/UL128/UL130/UL131 complex comprise the majority of the anti-cytomegalovirus (anti-  
695 CMV) neutralizing antibody response in CMV hyperimmune globulin. *Journal of virology*.  
696 2012;86(13):7444-7. doi: 10.1128/JVI.00467-12. PubMed PMID: 22532696; PubMed Central  
697 PMCID: PMCPMC3416310.
- 698 24. Nelson CS, Herold BC, Permar SR. A new era in cytomegalovirus vaccinology:  
699 considerations for rational design of next-generation vaccines to prevent congenital  
700 cytomegalovirus infection. *NPJ Vaccines*. 2018;3:38. Epub 2018/10/03. doi: 10.1038/s41541-  
701 018-0074-4. PubMed PMID: 30275984; PubMed Central PMCID: PMCPMC6148244 preclinical

- 702 HCMV vaccine programs. B.C.H. is an inventor on a pending patent application for a delta gD-2  
703 vaccine. The other authors have no conflicts of interest to declare.
- 704 25. Nelson CS, Huffman T, Jenks JA, Cisneros de la Rosa E, Xie G, Vandergrift N, et al.  
705 HCMV glycoprotein B subunit vaccine efficacy mediated by nonneutralizing antibody effector  
706 functions. *Proceedings of the National Academy of Sciences of the United States of America*.  
707 2018;115(24):6267-72. Epub 2018/05/02. doi: 10.1073/pnas.1800177115. PubMed PMID:  
708 29712861; PubMed Central PMCID: PMC604431.
- 709 26. Bialas KM, Tanaka T, Tran D, Varner V, Cisneros De La Rosa E, Chiuppesi F, et al.  
710 Maternal CD4+ T cells protect against severe congenital cytomegalovirus disease in a novel  
711 nonhuman primate model of placental cytomegalovirus transmission. *Proceedings of the*  
712 *National Academy of Sciences of the United States of America*. 2015;112(44):13645-50. Epub  
713 2015/10/21. doi: 10.1073/pnas.1511526112. PubMed PMID: 26483473; PubMed Central  
714 PMCID: PMC4640765.
- 715 27. Itell HL, Kaur A, Deere JD, Barry PA, Permar SR. Rhesus monkeys for a nonhuman  
716 primate model of cytomegalovirus infections. *Curr Opin Virol*. 2017;25:126-33. Epub  
717 2017/09/10. doi: 10.1016/j.coviro.2017.08.005. PubMed PMID: 28888133; PubMed Central  
718 PMCID: PMC5659282.
- 719 28. Boppana SB, Britt WJ. Antiviral Antibody Responses and Intrauterine Transmission after  
720 Primary Maternal Cytomegalovirus Infection. *Journal of Infectious Diseases*. 1995;171(5):1115-  
721 21. doi: 10.1093/infdis/171.5.1115.
- 722 29. Nelson CS, Cruz DV, Tran D, Bialas KM, Stamper L, Wu H, et al. Preexisting antibodies  
723 can protect against congenital cytomegalovirus infection in monkeys. *JCI Insight*. 2017;2(13).  
724 doi: 10.1172/jci.insight.94002. PubMed PMID: 28679960; PubMed Central PMCID:  
725 PMC5499366.
- 726 30. Bootz A, Karbach A, Spindler J, Kropff B, Reuter N, Sticht H, et al. Protective capacity of  
727 neutralizing and non-neutralizing antibodies against glycoprotein B of cytomegalovirus. *PLoS*  
728 *pathogens*. 2017;13(8):e1006601. Epub 2017/08/31. doi: 10.1371/journal.ppat.1006601.  
729 PubMed PMID: 28854233; PubMed Central PMCID: PMC5595347.
- 730 31. Forthal DN, Phan T, Landucci G. Antibody inhibition of cytomegalovirus: the role of  
731 natural killer and macrophage effector cells. *Transpl Infect Dis*. 2001;3 Suppl 2:31-4. PubMed  
732 PMID: 11926747.
- 733 32. Chen SF, Holmes TH, Slifer T, Ramachandran V, Mackey S, Hebson C, et al.  
734 Longitudinal Kinetics of Cytomegalovirus-Specific T-Cell Immunity and Viral Replication in  
735 Infants With Congenital Cytomegalovirus Infection. *J Pediatric Infect Dis Soc*. 2016;5(1):14-20.  
736 Epub 2016/02/26. doi: 10.1093/jpids/piu089. PubMed PMID: 26908487; PubMed Central  
737 PMCID: PMC4765489.
- 738 33. Hansen SG, Powers CJ, Richards R, Ventura AB, Ford JC, Siess D, et al. Evasion of  
739 CD8+ T cells is critical for superinfection by cytomegalovirus. *Science*. 2010;328(5974):102-6.  
740 Epub 2010/04/03. doi: 10.1126/science.1185350. PubMed PMID: 20360110; PubMed Central  
741 PMCID: PMC2883175.
- 742 34. Gamadia LE, Rentenaar RJ, van Lier RA, ten Berge IJ. Properties of CD4(+) T cells in  
743 human cytomegalovirus infection. *Hum Immunol*. 2004;65(5):486-92. Epub 2004/06/03. doi:  
744 10.1016/j.humimm.2004.02.020. PubMed PMID: 15172448.
- 745 35. Gerna G, Lilleri D, Fornara C, Bruno F, Gabanti E, Cane I, et al. Differential kinetics of  
746 human cytomegalovirus load and antibody responses in primary infection of the  
747 immunocompetent and immunocompromised host. *J Gen Virol*. 2015;96(Pt 2):360-9. Epub  
748 2014/10/16. doi: 10.1099/vir.0.070441-0. PubMed PMID: 25316796.
- 749 36. Widmann T, Sester U, Gartner BC, Schubert J, Pfreundschuh M, Kohler H, et al. Levels  
750 of CMV specific CD4 T cells are dynamic and correlate with CMV viremia after allogeneic stem  
751 cell transplantation. *PloS one*. 2008;3(11):e3634. Epub 2008/11/05. doi:

- 752 10.1371/journal.pone.0003634. PubMed PMID: 18982061; PubMed Central PMCID:  
753 PMCPMC2572846.
- 754 37. Lilleri D, Fornara C, Furione M, Zavattoni M, Revello MG, Gerna G. Development of  
755 human cytomegalovirus-specific T cell immunity during primary infection of pregnant women  
756 and its correlation with virus transmission to the fetus. *The Journal of infectious diseases*.  
757 2007;195(7):1062-70. Epub 2007/03/03. doi: 10.1086/512245. PubMed PMID: 17330798.
- 758 38. Revello MG, Lilleri D, Zavattoni M, Furione M, Genini E, Comolli G, et al.  
759 Lymphoproliferative response in primary human cytomegalovirus (HCMV) infection is delayed in  
760 HCMV transmitter mothers. *The Journal of infectious diseases*. 2006;193(2):269-76. Epub  
761 2005/12/20. doi: 10.1086/498872. PubMed PMID: 16362891.
- 762 39. Saldan A, Forner G, Mengoli C, Gussetti N, Palu G, Abate D. Strong Cell-Mediated  
763 Immune Response to Human Cytomegalovirus Is Associated With Increased Risk of Fetal  
764 Infection in Primarily Infected Pregnant Women. *Clin Infect Dis*. 2015;61(8):1228-34. Epub  
765 2015/07/16. doi: 10.1093/cid/civ561. PubMed PMID: 26175520.
- 766 40. Lilleri D, Zelini P, Fornara C, Zavaglio F, Rampino T, Perez L, et al. Human  
767 cytomegalovirus (HCMV)-specific T cell but not neutralizing or IgG binding antibody responses  
768 to glycoprotein complexes gB, gHgLgO, and pUL128L correlate with protection against high  
769 HCMV viral load reactivation in solid-organ transplant recipients. *J Med Virol*. 2018;90(10):1620-  
770 8. Epub 2018/05/26. doi: 10.1002/jmv.25225. PubMed PMID: 29797330.
- 771 41. Aubert G, Hassan-Walker AF, Madrigal JA, Emery VC, Morte C, Grace S, et al.  
772 Cytomegalovirus-specific cellular immune responses and viremia in recipients of allogeneic  
773 stem cell transplants. *The Journal of infectious diseases*. 2001;184(8):955-63. Epub  
774 2001/09/28. doi: 10.1086/323354. PubMed PMID: 11574909.
- 775 42. Sacre K, Carcelain G, Cassoux N, Fillet AM, Costagliola D, Vittecoq D, et al. Repertoire,  
776 diversity, and differentiation of specific CD8 T cells are associated with immune protection  
777 against human cytomegalovirus disease. *The Journal of experimental medicine*.  
778 2005;201(12):1999-2010. Epub 2005/06/22. doi: 10.1084/jem.20042408. PubMed PMID:  
779 15967826; PubMed Central PMCID: PMCPMC2212029.
- 780 43. Gabanti E, Bruno F, Lilleri D, Fornara C, Zelini P, Cane I, et al. Human cytomegalovirus  
781 (HCMV)-specific CD4+ and CD8+ T cells are both required for prevention of HCMV disease in  
782 seropositive solid-organ transplant recipients. *PloS one*. 2014;9(8):e106044. Epub 2014/08/29.  
783 doi: 10.1371/journal.pone.0106044. PubMed PMID: 25166270; PubMed Central PMCID:  
784 PMCPMC4148399.
- 785 44. Snyder LD, Chan C, Kwon D, Yi JS, Martissa JA, Copeland CA, et al. Polyfunctional T-  
786 Cell Signatures to Predict Protection from Cytomegalovirus after Lung Transplantation. *Am J*  
787 *Respir Crit Care Med*. 2016;193(1):78-85. Epub 2015/09/16. doi: 10.1164/rccm.201504-  
788 0733OC. PubMed PMID: 26372850; PubMed Central PMCID: PMCPMC4731614.
- 789 45. Pardi N, Hogan MJ, Pelc RS, Muramatsu H, Andersen H, DeMaso CR, et al. Zika virus  
790 protection by a single low-dose nucleoside-modified mRNA vaccination. *Nature*.  
791 2017;543(7644):248-51. doi: 10.1038/nature21428. PubMed PMID: 28151488; PubMed Central  
792 PMCID: PMCPMC5344708.
- 793 46. Pardi N, Hogan MJ, Porter FW, Weissman D. mRNA vaccines - a new era in  
794 vaccinology. *Nat Rev Drug Discov*. 2018;17(4):261-79. Epub 2018/01/13. doi:  
795 10.1038/nrd.2017.243. PubMed PMID: 29326426; PubMed Central PMCID: PMCPMC5906799.
- 796 47. Pardi N, Parkhouse K, Kirkpatrick E, McMahon M, Zost SJ, Mui BL, et al. Nucleoside-  
797 modified mRNA immunization elicits influenza virus hemagglutinin stalk-specific antibodies.  
798 *Nature communications*. 2018;9(1):3361. Epub 2018/08/24. doi: 10.1038/s41467-018-05482-0.  
799 PubMed PMID: 30135514; PubMed Central PMCID: PMCPMC6105651.
- 800 48. John S, Yuzhakov O, Woods A, Deterling J, Hassett K, Shaw CA, et al. Multi-antigenic  
801 human cytomegalovirus mRNA vaccines that elicit potent humoral and cell-mediated immunity.

- 802 Vaccine. 2018;36(12):1689-99. Epub 2018/02/20. doi: 10.1016/j.vaccine.2018.01.029. PubMed  
803 PMID: 29456015.
- 804 49. Pardi N, Tuyishime S, Muramatsu H, Kariko K, Mui BL, Tam YK, et al. Expression  
805 kinetics of nucleoside-modified mRNA delivered in lipid nanoparticles to mice by various routes.  
806 J Control Release. 2015;217:345-51. Epub 2015/08/13. doi: 10.1016/j.jconrel.2015.08.007.  
807 PubMed PMID: 26264835; PubMed Central PMCID: PMC4624045.
- 808 50. Lambert PH, Laurent PE. Intradermal vaccine delivery: will new delivery systems  
809 transform vaccine administration? Vaccine. 2008;26(26):3197-208. Epub 2008/05/20. doi:  
810 10.1016/j.vaccine.2008.03.095. PubMed PMID: 18486285.
- 811 51. Pardi N, Muramatsu H, Weissman D, Kariko K. In vitro transcription of long RNA  
812 containing modified nucleosides. Methods in molecular biology. 2013;969:29-42. Epub  
813 2013/01/09. doi: 10.1007/978-1-62703-260-5\_2. PubMed PMID: 23296925.
- 814 52. Thess A, Grund S, Mui BL, Hope MJ, Baumhof P, Fotin-Mleczek M, et al. Sequence-  
815 engineered mRNA Without Chemical Nucleoside Modifications Enables an Effective Protein  
816 Therapy in Large Animals. Mol Ther. 2015;23(9):1456-64. Epub 2015/06/09. doi:  
817 10.1038/mt.2015.103. PubMed PMID: 26050989; PubMed Central PMCID: PMC4817881.
- 818 53. Weissman D, Pardi N, Muramatsu H, Kariko K. HPLC purification of in vitro transcribed  
819 long RNA. Methods in molecular biology. 2013;969:43-54. Epub 2013/01/09. doi: 10.1007/978-  
820 1-62703-260-5\_3. PubMed PMID: 23296926.
- 821 54. Maier MA, Jayaraman M, Matsuda S, Liu J, Barros S, Querbes W, et al. Biodegradable  
822 lipids enabling rapidly eliminated lipid nanoparticles for systemic delivery of RNAi therapeutics.  
823 Mol Ther. 2013;21(8):1570-8. Epub 2013/06/27. doi: 10.1038/mt.2013.124. PubMed PMID:  
824 23799535; PubMed Central PMCID: PMC3734658.
- 825 55. Jayaraman M, Ansell SM, Mui BL, Tam YK, Chen J, Du X, et al. Maximizing the potency  
826 of siRNA lipid nanoparticles for hepatic gene silencing in vivo. Angew Chem Int Ed Engl.  
827 2012;51(34):8529-33. Epub 2012/07/12. doi: 10.1002/anie.201203263. PubMed PMID:  
828 22782619; PubMed Central PMCID: PMC3470698.
- 829 56. Wang D, Li F, Freed DC, Finnefrock AC, Tang A, Grimes SN, et al. Quantitative analysis  
830 of neutralizing antibody response to human cytomegalovirus in natural infection. Vaccine.  
831 2011;29(48):9075-80. doi: 10.1016/j.vaccine.2011.09.056. PubMed PMID: 21945962.
- 832 57. Wang D, Yu QC, Schroer J, Murphy E, Shenk T. Human cytomegalovirus uses two  
833 distinct pathways to enter retinal pigmented epithelial cells. Proceedings of the National  
834 Academy of Sciences of the United States of America. 2007;104(50):20037-42. Epub  
835 2007/12/14. doi: 10.1073/pnas.0709704104. PubMed PMID: 18077432; PubMed Central  
836 PMCID: PMC2148418.
- 837 58. In: th, editor. Guide for the Care and Use of Laboratory Animals. The National  
838 Academies Collection: Reports funded by National Institutes of Health. Washington (DC)2011.
- 839



840 **Figures and Figure Legends:**

841

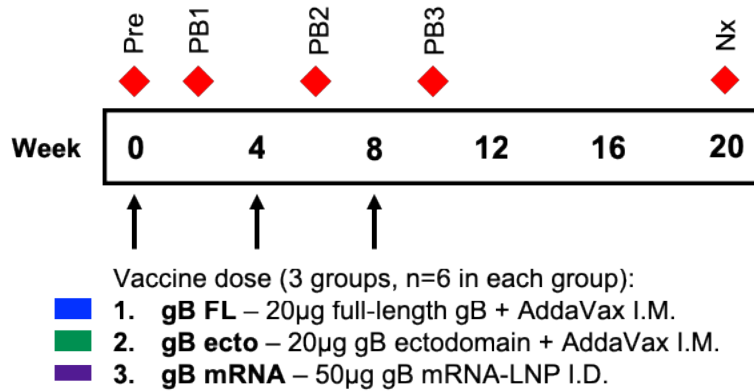

842

843 **Figure 1. Vaccination and sampling timeline.** At 0, 4, and 8 weeks, juvenile New Zealand White

844 rabbits were administered 50µg doses of either full-length gB protein + AddaVax intramuscularly

845 (blue), gB ectodomain protein + AddaVax intramuscularly (green), or lipid nanoparticle-packaged

846 gB mRNA intradermally (purple). Blood was sampled at the following timepoints indicated by red

847 diamonds: preimmune (0 weeks; 'Pre'), post boost 1 (2 weeks, 'PB1'), post boost 2 (6 weeks,

848 'PB2'), post boost 3 (10 weeks, 'PB3'), and necropsy (20 weeks, 'Nx').

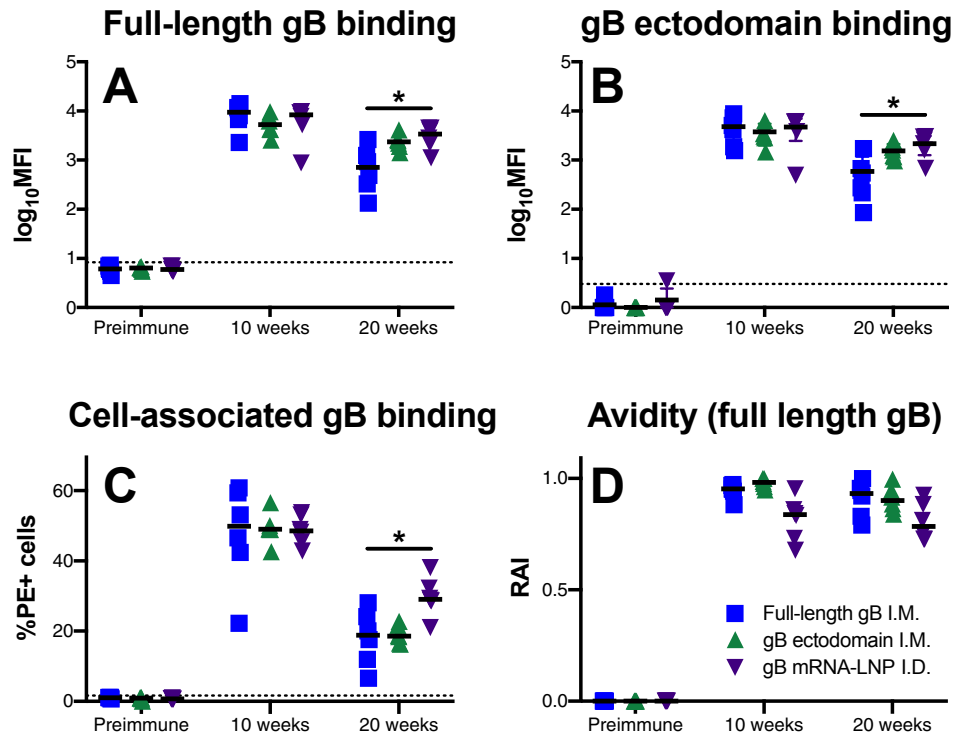

849

850 **Figure 2. gB mRNA-LNP vaccination elicits more durable binding antibody responses**  
851 **against soluble and cell-associated gB.** IgG binding to full-length gB (A) and gB ectodomain  
852 (B) proteins were assessed by BAMA. IgG binding to gB-transfected cells (C) was measured by  
853 flow cytometry. gB binding avidity was assessed against full-length gB using urea-wash ELISA.  
854 All proteins were strain-matched (Towne). IgG responses for full-length gB vaccinees are shown  
855 in blue, gB ectodomain in green, and gB mRNA-LNP in purple. Binding responses were assessed  
856 for preimmune, 10 week (post boost 3, peak immunogenicity), and 20 week (necropsy) timepoints.  
857 Data points represent individual animals, with the line designating the median. Dotted black line  
858 indicates the mean preimmune response + 2 standard deviations. \* $p < 0.05$ , Kruskal-Wallis + *post*  
859 *hoc* Mann-Whitney U test.

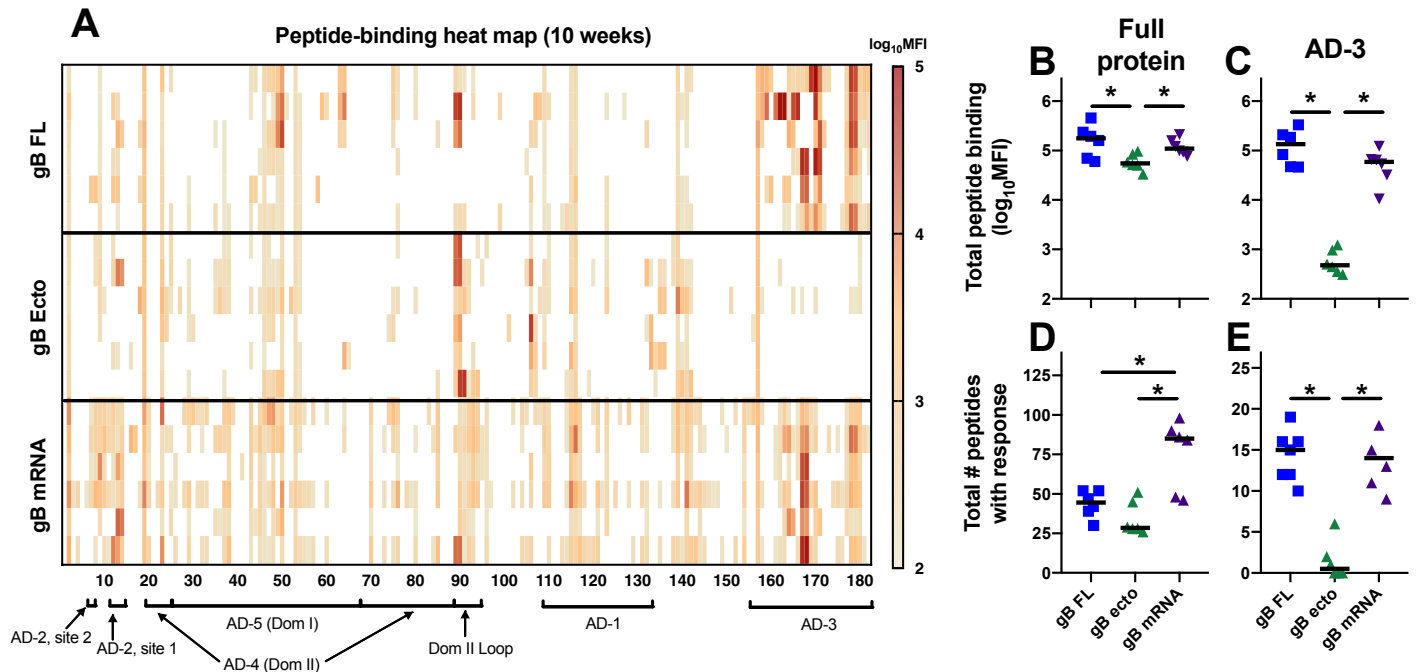

860

861 **Figure 3. gB mRNA-LNP vaccination reduced AD-3 immunodominance, yet enhances**

862 **breadth of linear peptide binding IgG response.** (A) The binding magnitude of rabbit antibodies

863 at week 10 (post boost 3, peak immunogenicity) were assessed against a 15-mer peptide library

864 spanning the entire Towne gB ORF (180 unique peptides). Each row indicates a single rabbit.

865 Peptides corresponding to distinct gB antigenic domains are indicated along the x-axis. (B,C) The

866 sum of total peptide-binding MFI to both the full gB protein (B) and those peptide corresponding

867 to the AD-3 epitope (C). (D,E) Number of unique peptides with a binding response >100 MFI for

868 the full gB protein (C) and AD-3 epitope (E). Responses for full-length gB vaccinees are in

869 blue, gB ectodomain in green, and gB mRNA-LNP in purple. Data points represent individual

870 animals, with the line designating the median. \* $p < 0.05$ , Kruskal-Wallis + *post hoc* Mann-Whitney

871 U test.

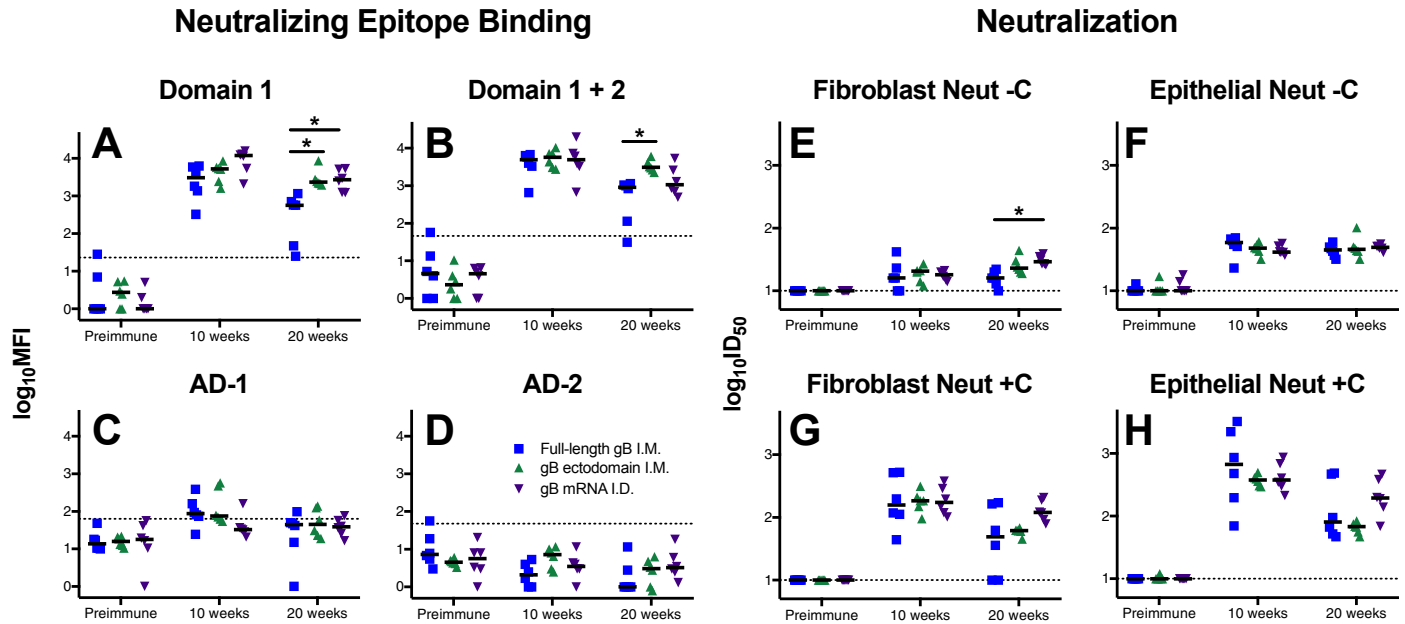

872

873 **Figure 4. Enhanced durability of HCMV-neutralizing antibodies following gB mRNA-LNP**

874 **vaccination.** Vaccine-elicited binding to glycoprotein B neutralizing epitopes domain 1 (A),

875 domain 1+2 (B), AD-1 (C), and AD-2 site 1 (D) was assessed by BAMA. Neutralization of

876 heterologous virus AD169r in the absence (-C; E-F) and presence (+C; G-H) of purified rabbit

877 complement on MRC-5 fibroblast cells (E,G) and ARPE epithelial cells (F,H). Full-length gB

878 vaccinees are shown in blue, gB ectodomain in green, and gB mRNA-LNP in purple. Antibody

879 responses were assessed for preimmune, 10 week (post boost 3, peak immunogenicity), and 20

880 week (necropsy) timepoints. Data points represent individual animals, with the line designating

881 the median. Dotted black line indicates the mean preimmune response + 2 standard deviations.

882 \*p<0.05, Kruskal-Wallis + *post hoc* Mann-Whitney U test.

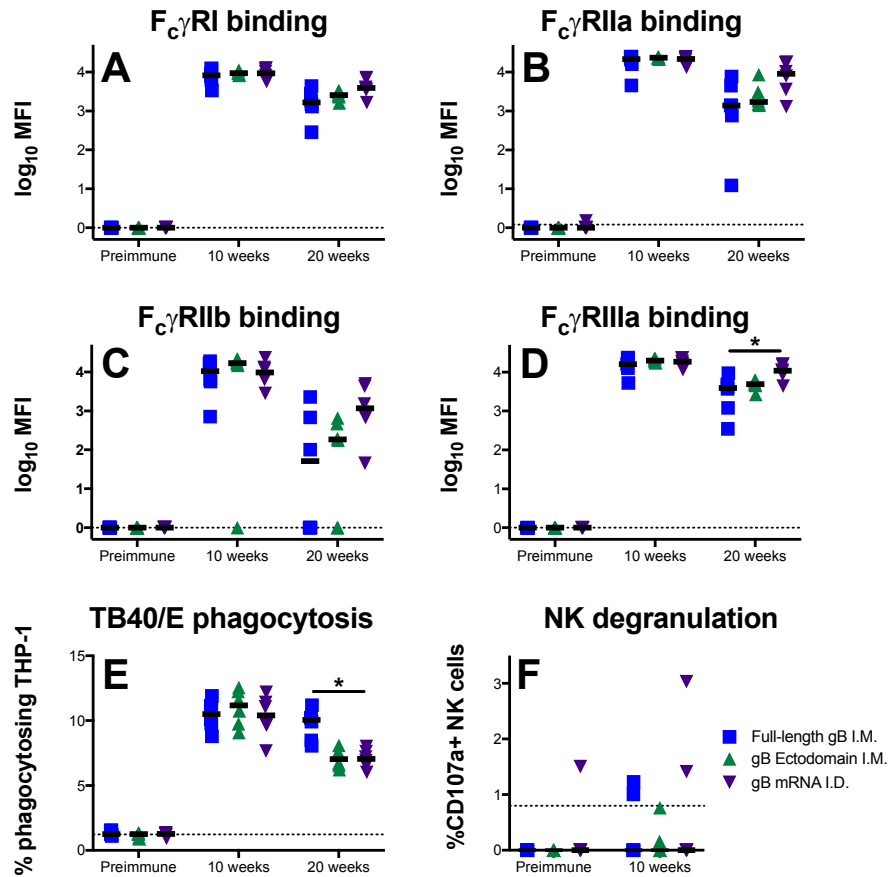

883

884 **Figure 5. gB mRNA-LNP vaccination elicits long-lived gB-specific IgG-F<sub>c</sub>γ receptor**  
885 **engagement, though reduced durability of virion phagocytosis response.** Vaccine-elicited  
886 IgG engagement of FcγRI (A), FcγRIIIa (B), FcγRIIb (C), and FcγRIIIa (D) was assessed by  
887 BAMA. Phagocytosis of fluorophore-coupled whole HCMV (TB40/E) virions was measured by  
888 flow cytometry (E). Upregulation of CD107a on the surface of NK cells in the presence of HCMV-  
889 infected cells was assessed by flow cytometry as an approximation of ADCC-activity (F). Full-  
890 length gB vaccinees are shown in blue, gB ectodomain in green, and gB mRNA-LNP in purple.  
891 Antibody responses were assessed for preimmune, 10 week (post boost 3, peak immunogenicity),  
892 and 20 week (necropsy) timepoints. Data points represent individual animals, with the line  
893 designating the median. Dotted black line indicates the mean preimmune response + 2 standard  
894 deviations. \*p<0.05, Kruskal-Wallis + *post hoc* Mann-Whitney U test.

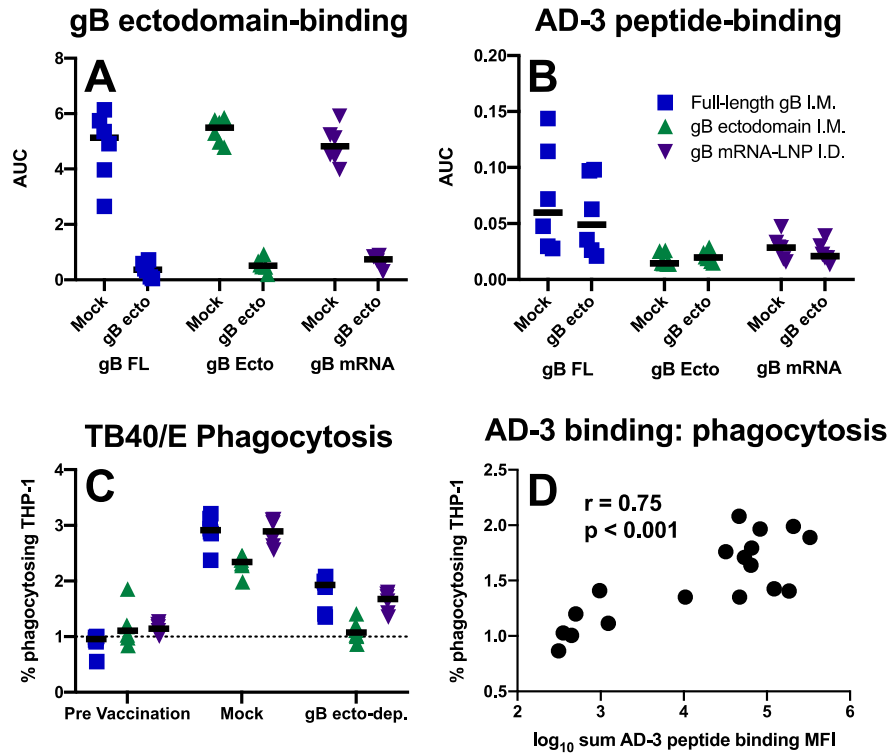

896

897 **Figure 6. Phagocytosis-mediating antibodies directed against gB AD-3.** Binding antibodies  
898 targeting gB ectodomain are not detectable in gB ectodomain-depleted sera (A), though  
899 antibodies targeting an immunodominant linear peptide within the AD-3 region  
900 (QDKGQKPNLLDRLRH) persist (B). ‘Mock’ = mock depleted sera using HIV-1 gp120, ‘gB ecto’  
901 = gB ectodomain depleted sera. (C) Phagocytosis of whole HCMV (TB40/E) virions remained  
902 measurable by flow cytometry for samples depleted of ectodomain-targeting antibodies (i.e. with  
903 AD-3-specific antibodies remaining). (D) Spearman correlation of AD-3 peptide binding IgG  
904 magnitude with phagocytosis activity mediated by gB ectodomain-depleted serum antibodies.  
905 Full-length gB vaccinees are shown in blue, gB ectodomain in green, and gB mRNA-LNP in  
906 purple. Data points represent individual animals, with the line designating the median. Dotted  
907 black line indicates the mean preimmune response + 2 standard deviations.

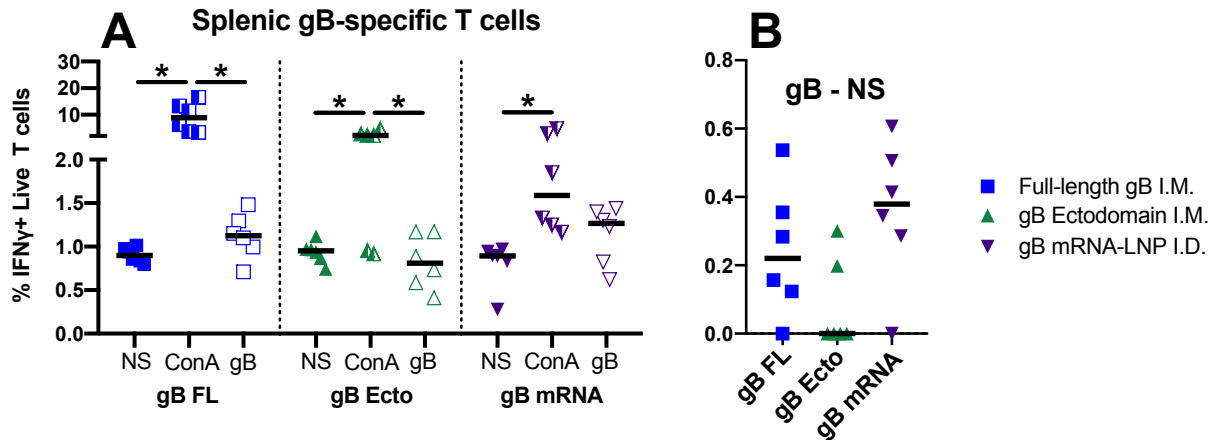

908

909 **Figure 7. Full-length gB and gB mRNA-LNP vaccines elicit antigen-specific T cells in**

910 **spleen of majority of vaccinees. (A)** Splenic cells were either not stimulated (NS), incubated

911 with Concanavalin A (ConA), or with a pool of gB peptides (gB), then stained for Ken-5 (rabbit

912 pan T cell marker) and IFN $\gamma$ . The percentage of live T cells that stained positive for IFN $\gamma$  are

913 plotted. (B) For each animal, the difference between the percentage of gB-stimulated and

914 unstimulated cells is plotted. Full-length gB vaccinees are shown in blue, gB ectodomain in green,

915 and gB mRNA-LNP in purple. Data points represent individual animals, with the line designating

916 the median. \*p<0.05, Friedman test + *post hoc* Wilcoxon matched pairs signed-rank test.

917 **Tables:**

918

919 **Table 1. Summary of vaccine-elicited immune responses at week 20.**

| Category                                        | Median response magnitude                                  | gB FL            | gB ecto     | gB mRNA       |
|-------------------------------------------------|------------------------------------------------------------|------------------|-------------|---------------|
| <b>gB Binding</b>                               | gB FL binding (log <sub>10</sub> MFI)                      | 2.85             | 3.37        | <b>3.53*</b>  |
|                                                 | gB ecto binding MFI (log <sub>10</sub> MFI)                | 2.77             | 3.19        | <b>3.34*</b>  |
|                                                 | Cell-assoc. gB binding (% cells)                           | 18.81            | 18.58       | <b>29.05*</b> |
|                                                 | RAI (gB FL target)                                         | <b>0.93</b>      | 0.90        | 0.78          |
| <b>Peptide binding<sup>+</sup></b>              | Total binding sum (log <sub>10</sub> MFI)                  | <b>5.25</b>      | 4.74        | 5.04          |
|                                                 | AD-3 binding sum (log <sub>10</sub> MFI)                   | <b>5.12</b>      | 2.27        | 4.77          |
|                                                 | # peptides bound (>100 MFI)                                | 44.5             | 28.5        | <b>85*</b>    |
| <b>Neut. Epitope Binding and Neutralization</b> | Domain I binding (log <sub>10</sub> MFI)                   | 2.76             | 3.37        | <b>3.44*</b>  |
|                                                 | Domain I+II binding (log <sub>10</sub> MFI)                | 2.96             | <b>3.49</b> | 3.03          |
|                                                 | AD-1 binding (log <sub>10</sub> MFI)                       | NMR <sup>†</sup> | NMR         | NMR           |
|                                                 | AD-2 binding (log <sub>10</sub> MFI)                       | NMR              | NMR         | NMR           |
|                                                 | AD169r Fibro Neut +C (log <sub>10</sub> ID <sub>50</sub> ) | 1.69             | 1.79        | <b>2.08</b>   |
|                                                 | AD169 Epi Neut +C (log <sub>10</sub> ID <sub>50</sub> )    | 1.91             | 1.83        | <b>2.29</b>   |
| <b>Fcγ receptor binding and function</b>        | FcγRI binding (log <sub>10</sub> MFI)                      | 3.22             | 3.41        | <b>3.59</b>   |
|                                                 | FcγRIIa binding (log <sub>10</sub> MFI)                    | 3.14             | 3.24        | <b>3.29</b>   |
|                                                 | FcγRIIb binding (log <sub>10</sub> MFI)                    | 1.71             | 2.27        | <b>3.07</b>   |
|                                                 | FcγRIIIa binding (log <sub>10</sub> MFI)                   | 3.59             | 3.69        | <b>4.04*</b>  |
|                                                 | TB40/E virion phagocytosis (% cells)                       | <b>10.06*</b>    | 7.04        | 7.06          |
|                                                 | NK degranulation (% cells)                                 | NMR              | NMR         | NMR           |
| <b>T cells</b>                                  | Splenic gB-specific T cells (BS, % live T)                 | 0.22             | NMR         | <b>0.38</b>   |

920

921 \* p<0.05, Kruskal-Wallis + *post hoc* Mann-Whitney U test (compared to gB FL)

922 + Peptide binding using week 10 sera

923 † NMR = no measurable response above baseline levels

924



925 **Supporting Information Legends:**

926

927 **Figure S1. Enhanced breadth of gB peptide-binding responses elicited by gB mRNA-LNP**

928 **vaccination.** (A) Sum of linear gB peptide binding IgG magnitude at peak immunogenicity  
929 (week 10) to peptides within known antigenic epitopes – AD-1, AD-2 site 1, AD-2 site 2, AD-3,  
930 AD-4 (Domain 2), AD-5 (Domain 1), and the furin protease cleavage site. Binding to linear  
931 peptides outside these known antigenic regions is denoted ‘other’. Full-length gB vaccinees are  
932 shown in blue, gB ectodomain in green, and gB mRNA-LNP in purple. Data points represent  
933 individual animals, with the line designating the median. \* $p < 0.05$ , Kruskal-Wallis + posthoc  
934 Mann-Whitney U test (B-D).

935

936 **Figure S2. No difference in durability of autologous neutralization between vaccination**

937 **groups.** (A,B) Neutralization of Towne autologous virus in the absence (-C; A) and presence  
938 (+C; B) of purified rabbit complement on MRC-5 fibroblast cells. Full-length gB vaccinees are  
939 shown in blue, gB ectodomain in green, and gB mRNA-LNP in purple. Data points represent  
940 individual animals, with the line designating the median. Dotted black line indicates the mean  
941 preimmune response + 2 standard deviations.

942

943 **Figure S3. Rapid induction of gB-specific IgG that engage  $F_{c\gamma}$  receptor following a single**

944 **mRNA vaccine dose.** Vaccine-elicited IgG engagement of  $F_{c\gamma}RI$  (A),  $F_{c\gamma}RIIa$  (B),  $F_{c\gamma}RIIb$  (C),  
945 and  $F_{c\gamma}RIIIa$  (D) was assessed by BAMA. Antibody responses were assessed for preimmune  
946 and 2 week (post boost 1) timepoints. Full-length gB vaccinees are shown in blue, gB ectodomain  
947 in green, and gB mRNA-LNP in purple. Data points represent individual animals, with the line  
948 designating the median. Dotted black line indicates the mean preimmune response + 2 standard  
949 deviations. \* $p < 0.05$ , Kruskal-Wallis + posthoc Mann-Whitney U test.

950 **Figure S4. Example flow cytometry gating scheme for rabbit splenic T cells.** Spleen cells  
951 shown from ConA-stimulated, full-length gB I.M. vaccinated rabbit. (A) Cells were selected using  
952 forward and side scatter. (B) Live rabbit T cells were identified using AQUA live/dead stain  
953 (Invitrogen) as well as Ken-5 (pan-T cell marker) specific antibody (AF647). (C) IFN $\gamma$ + T cell  
954 subpopulation identified by intracellular cytokine staining (AF488).

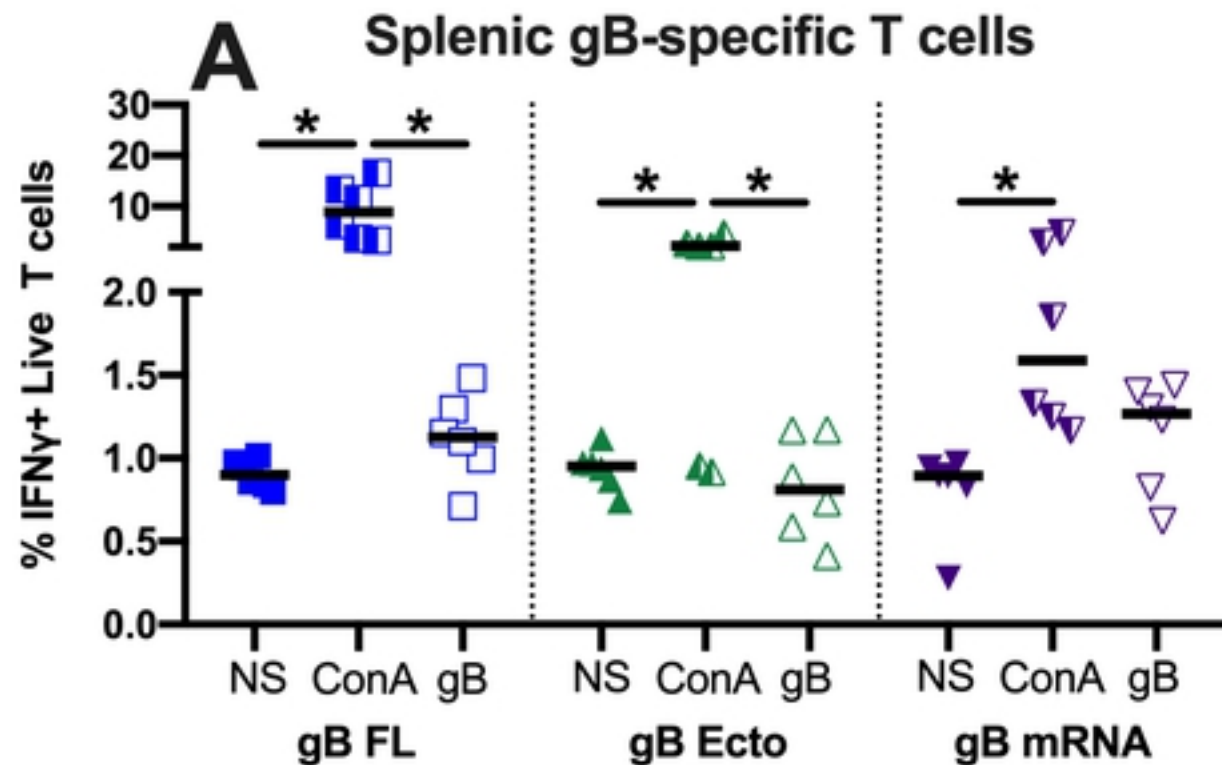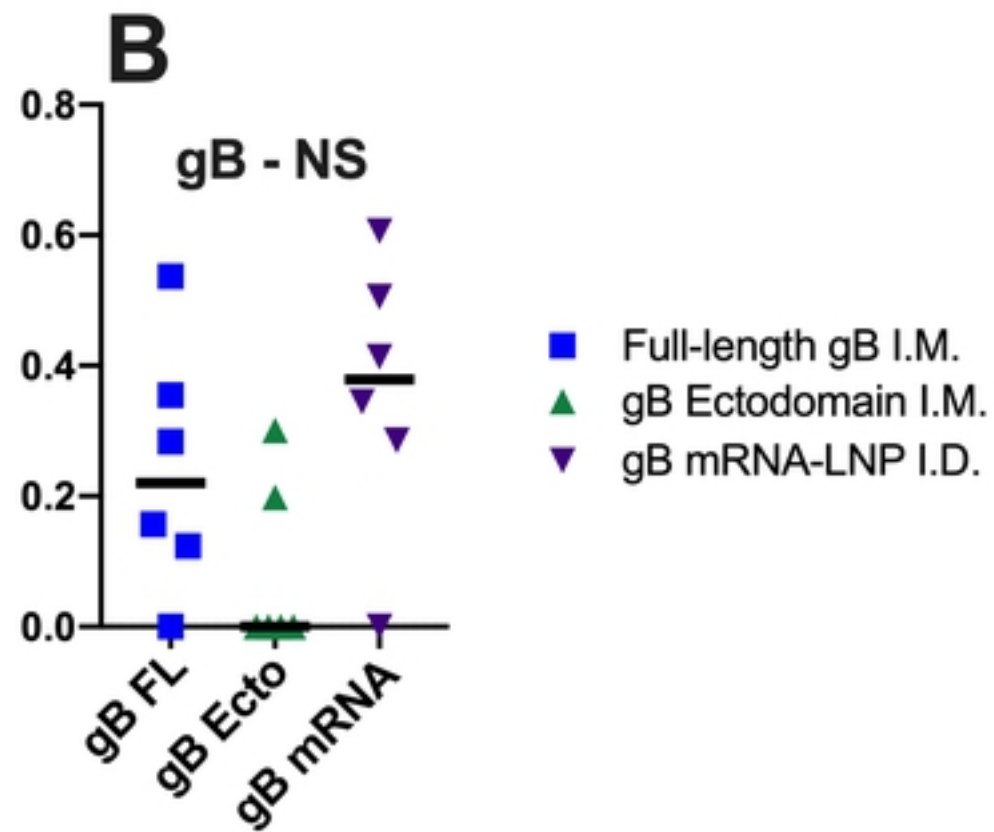

Figure 7

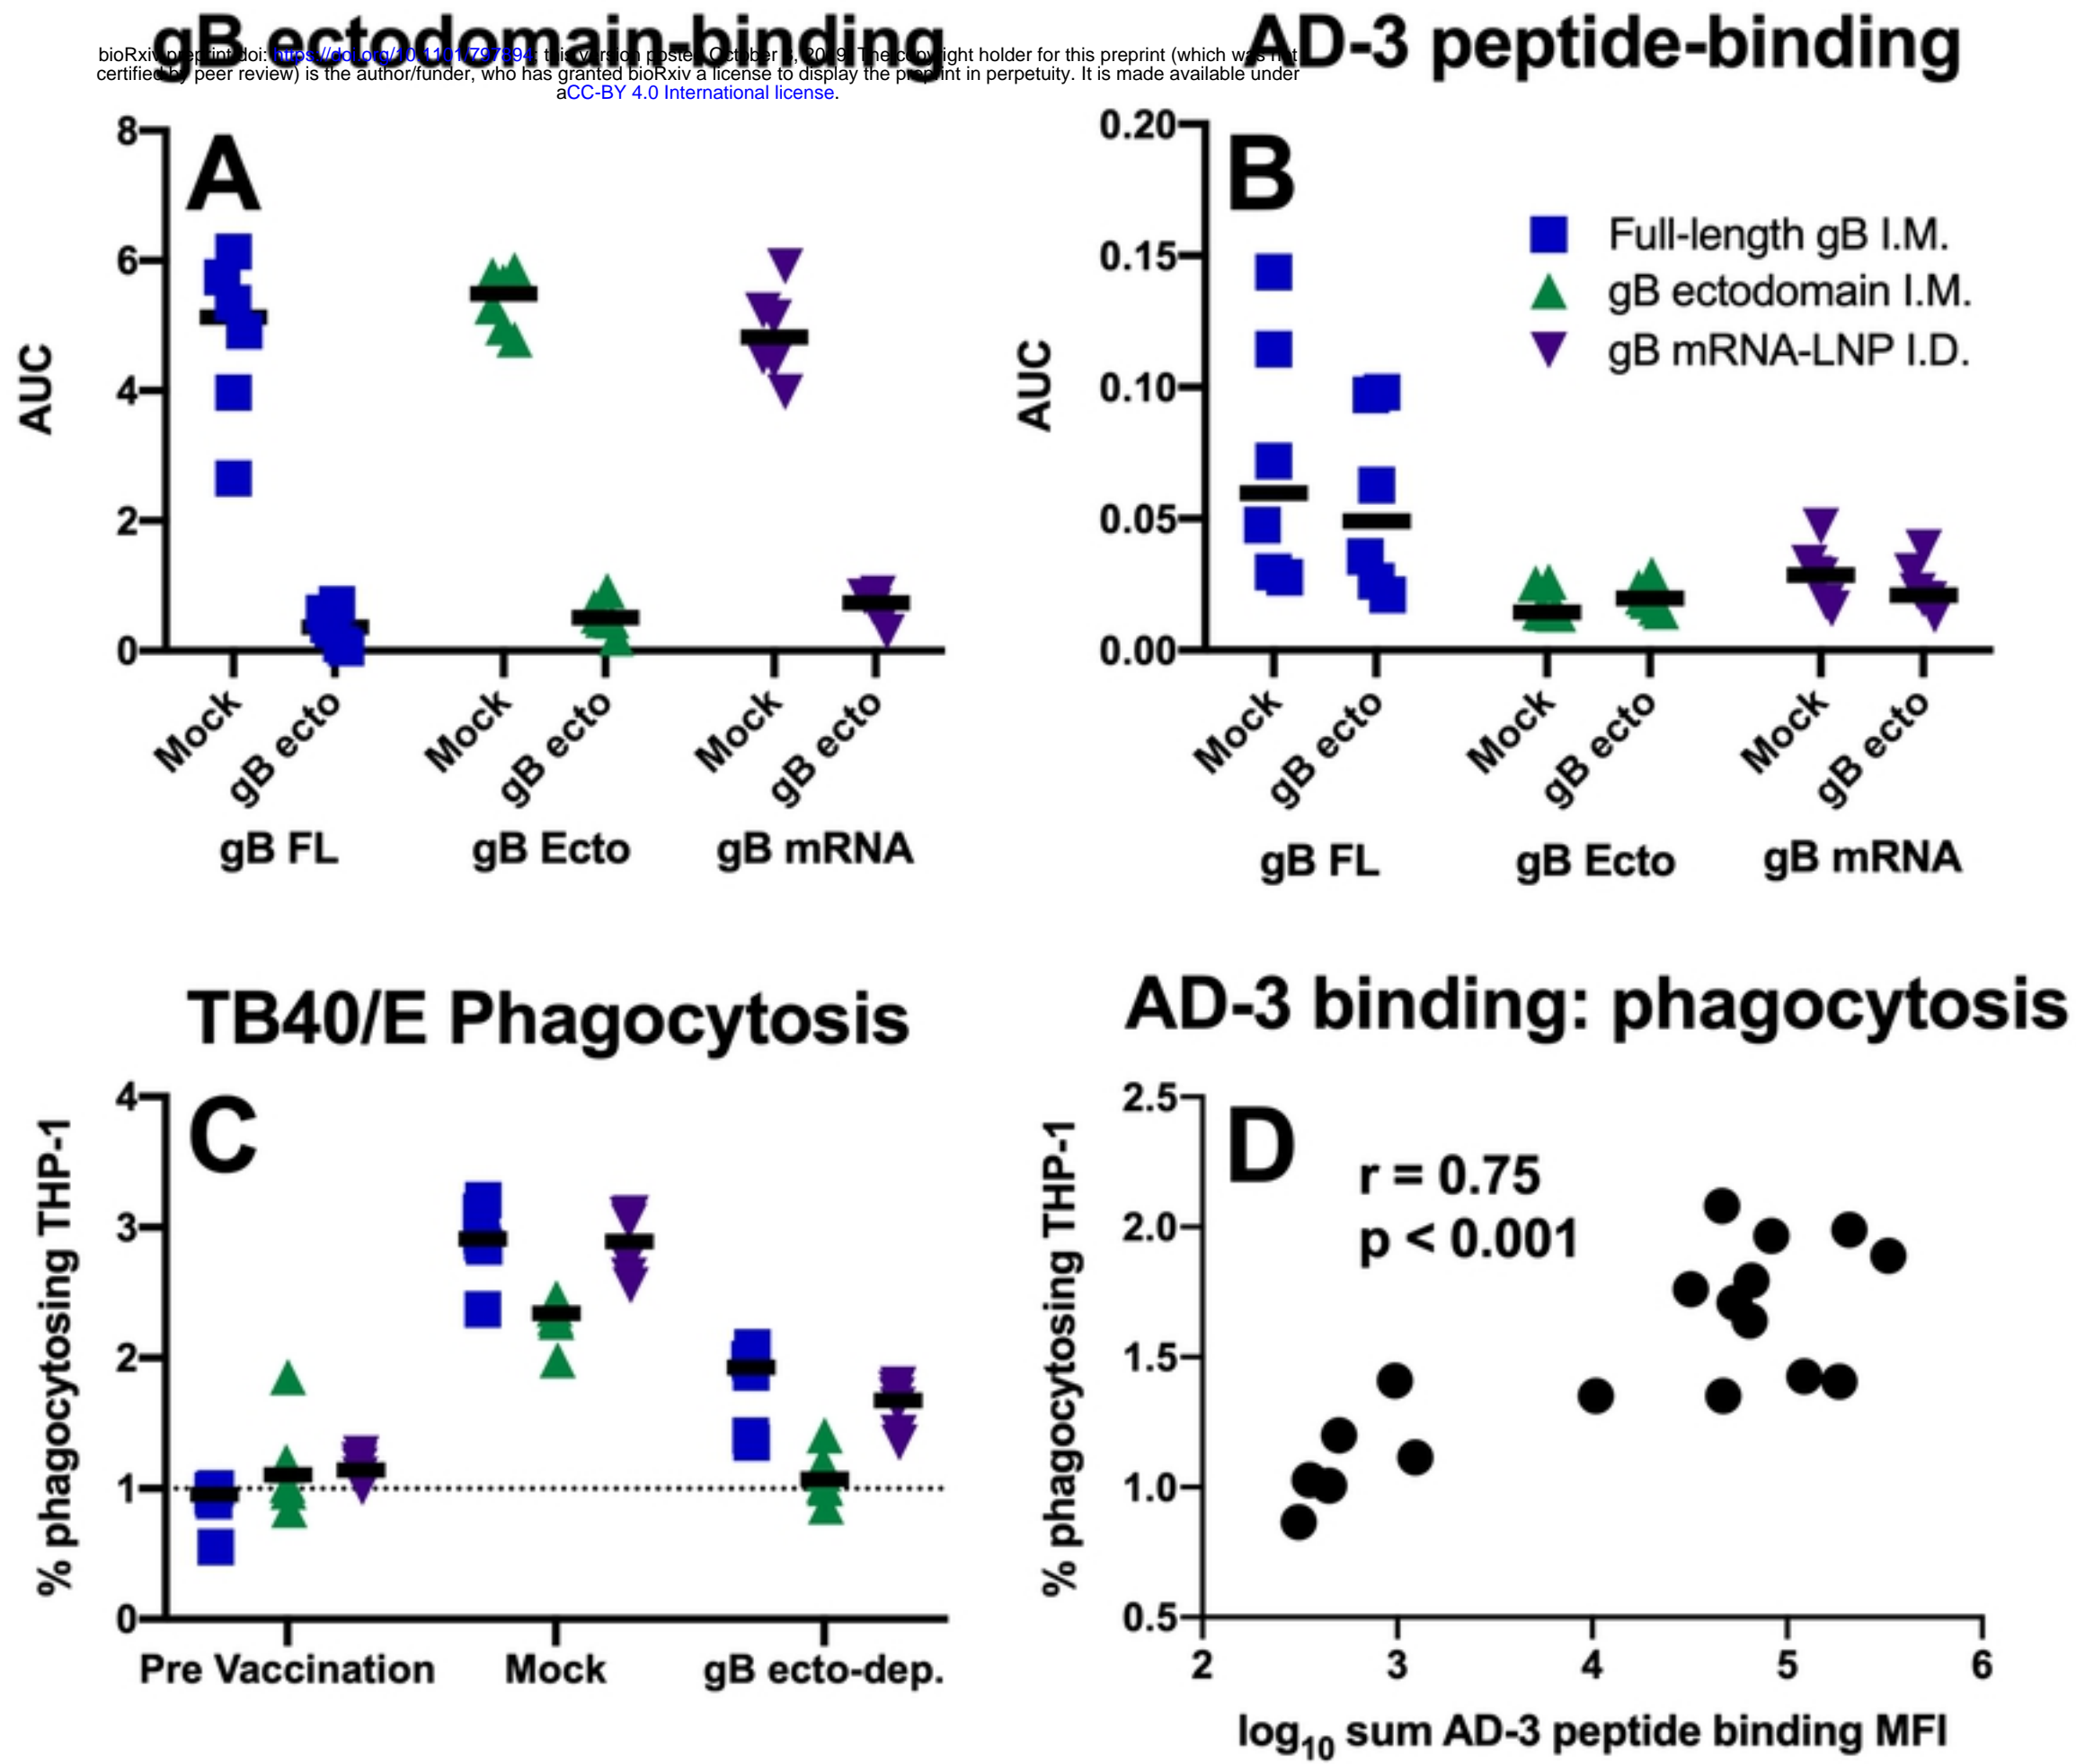

Figure 6

### F<sub>c</sub>γRI binding

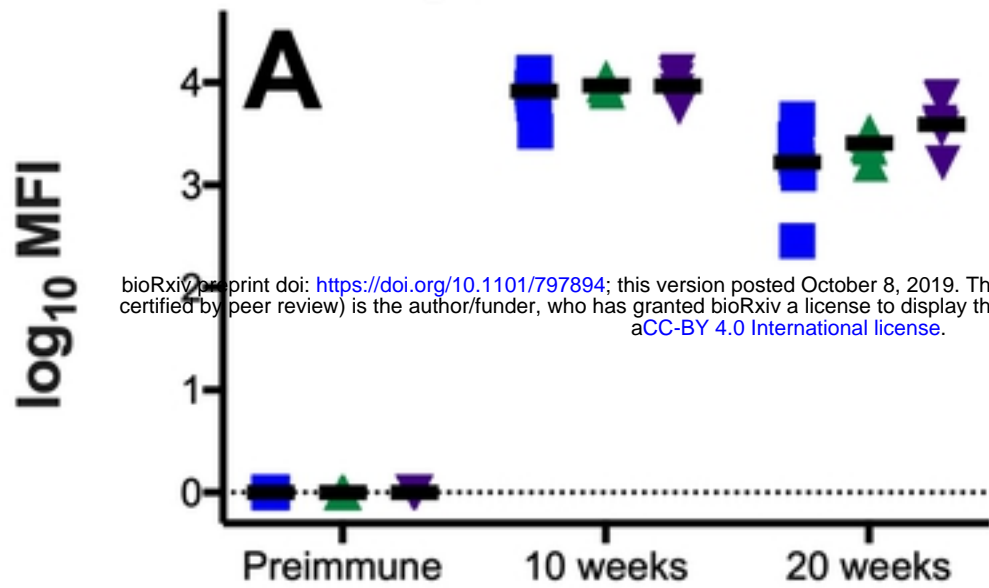

### F<sub>c</sub>γRIIa binding

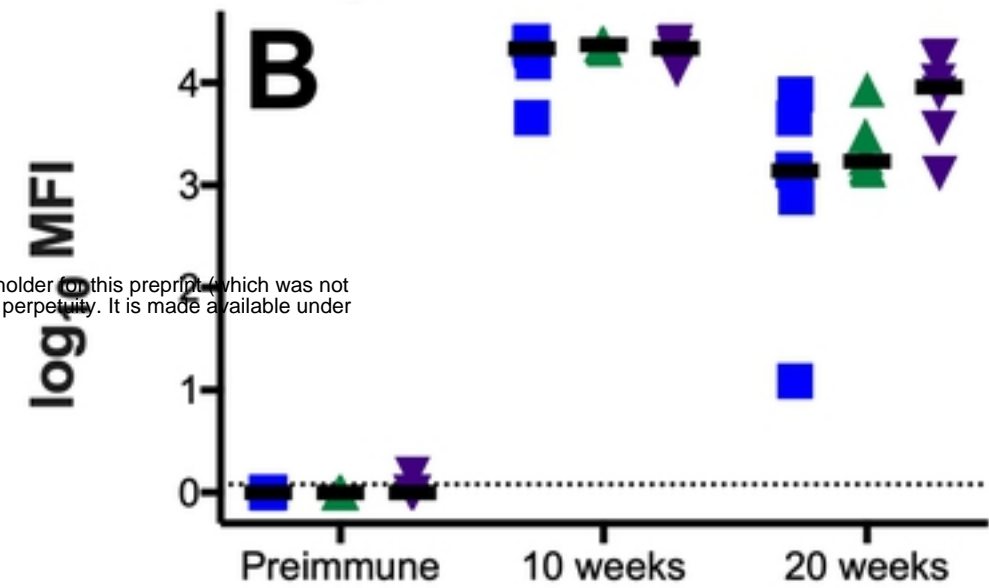

### F<sub>c</sub>γRIIb binding

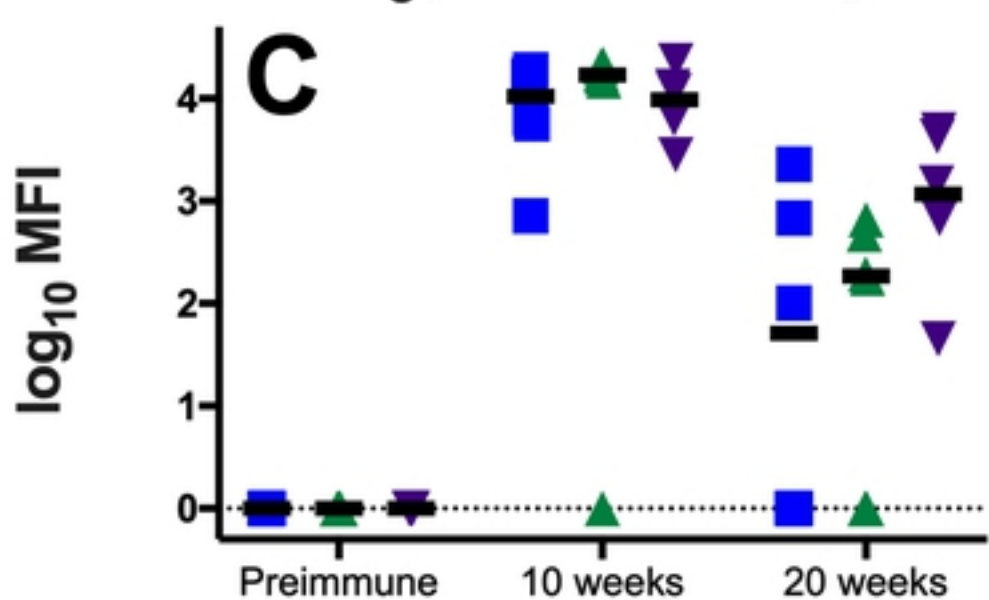

### F<sub>c</sub>γRIIIa binding

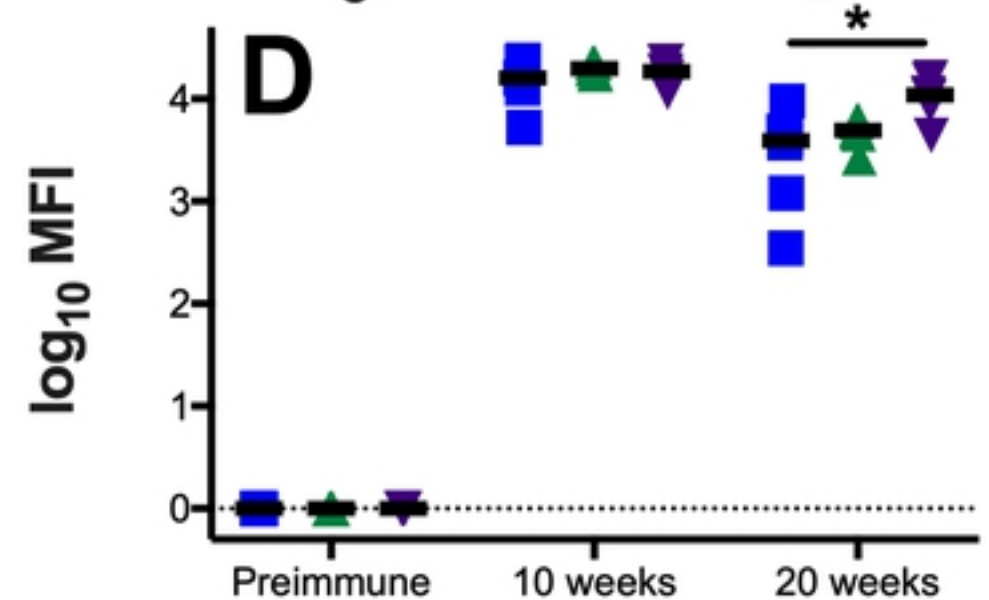

### TB40/E phagocytosis

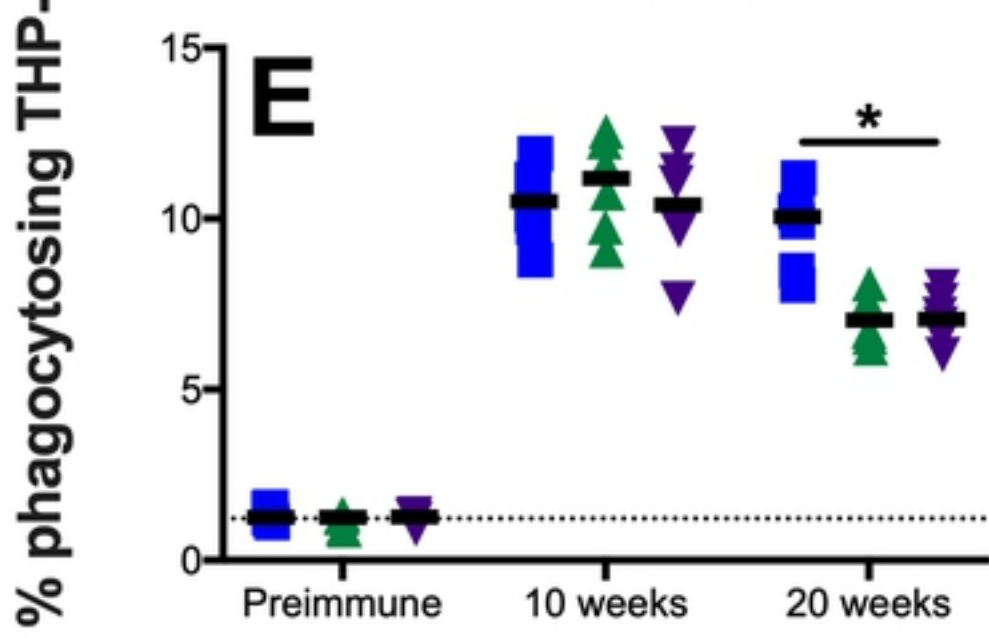

### NK degranulation

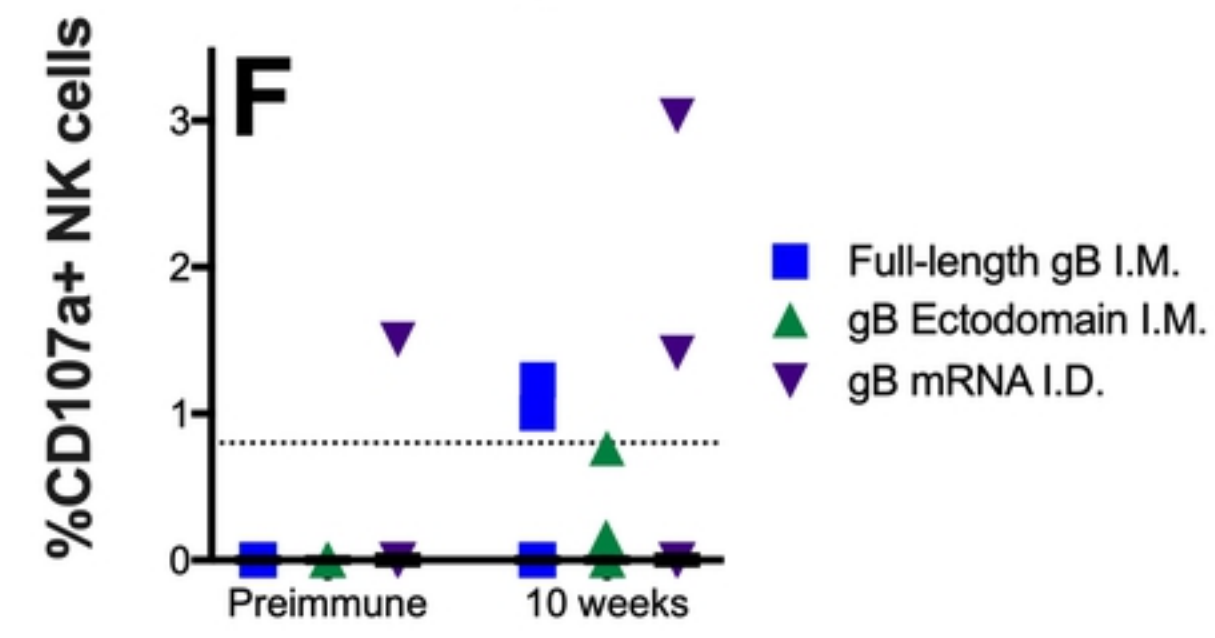

Figure 5

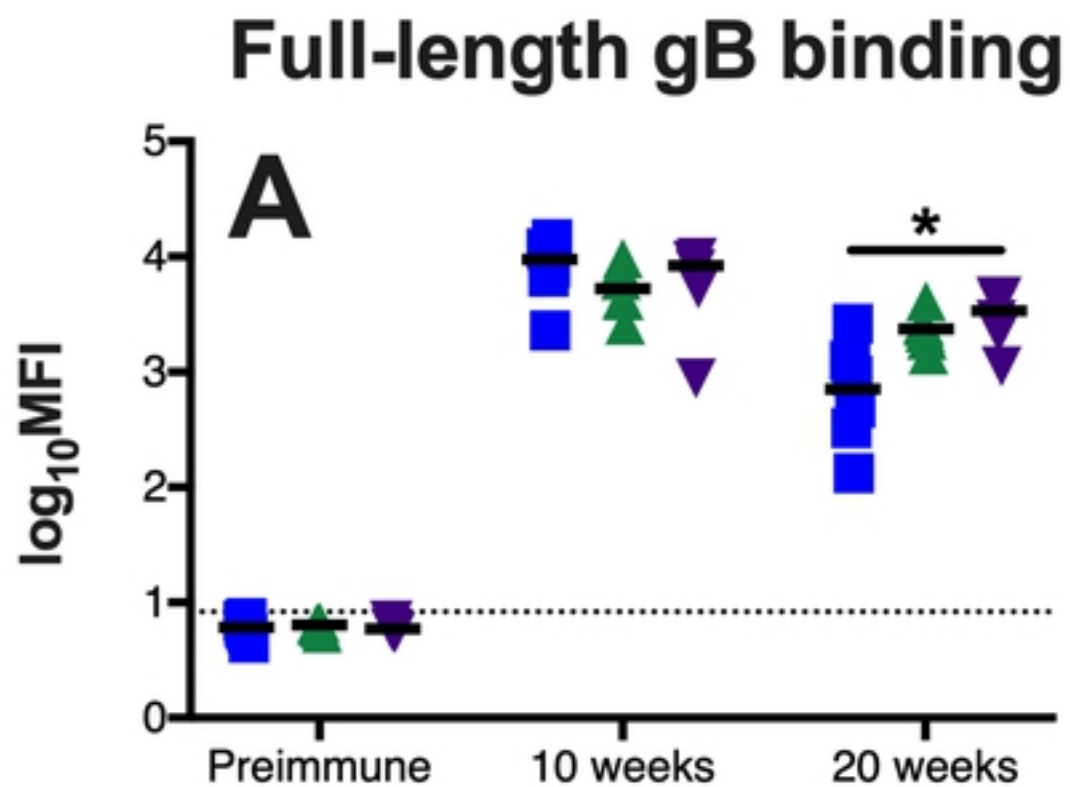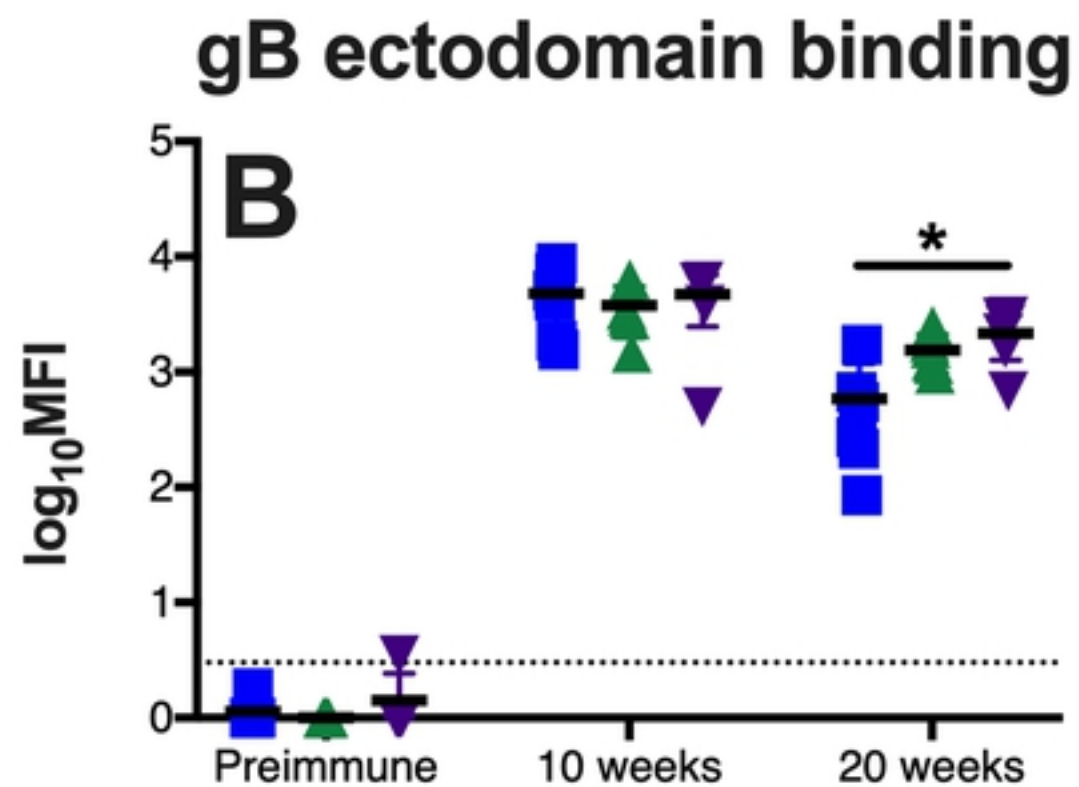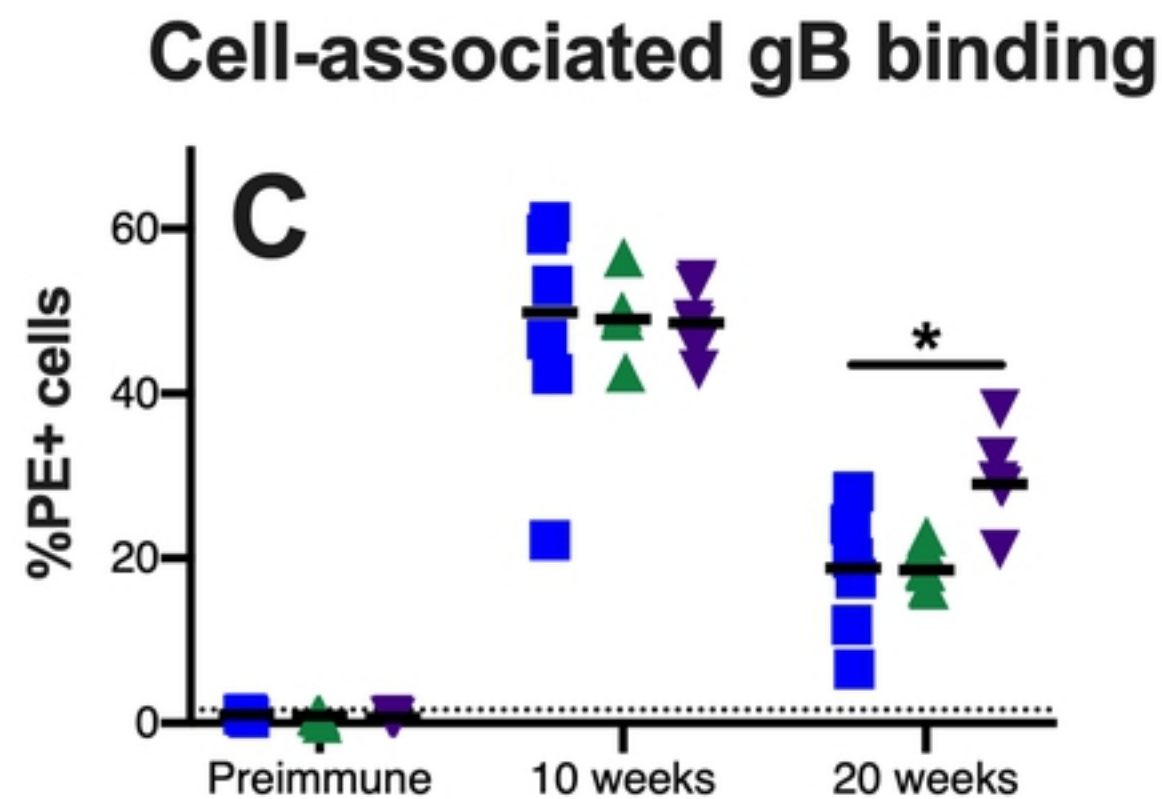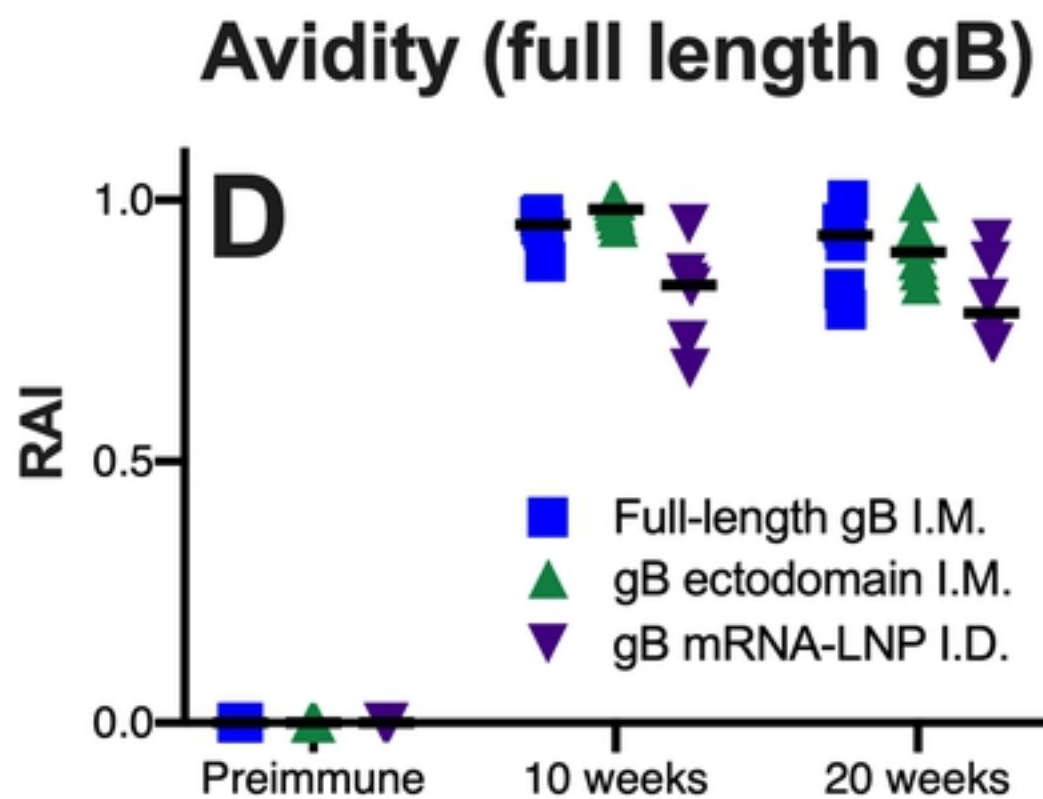

Figure 2

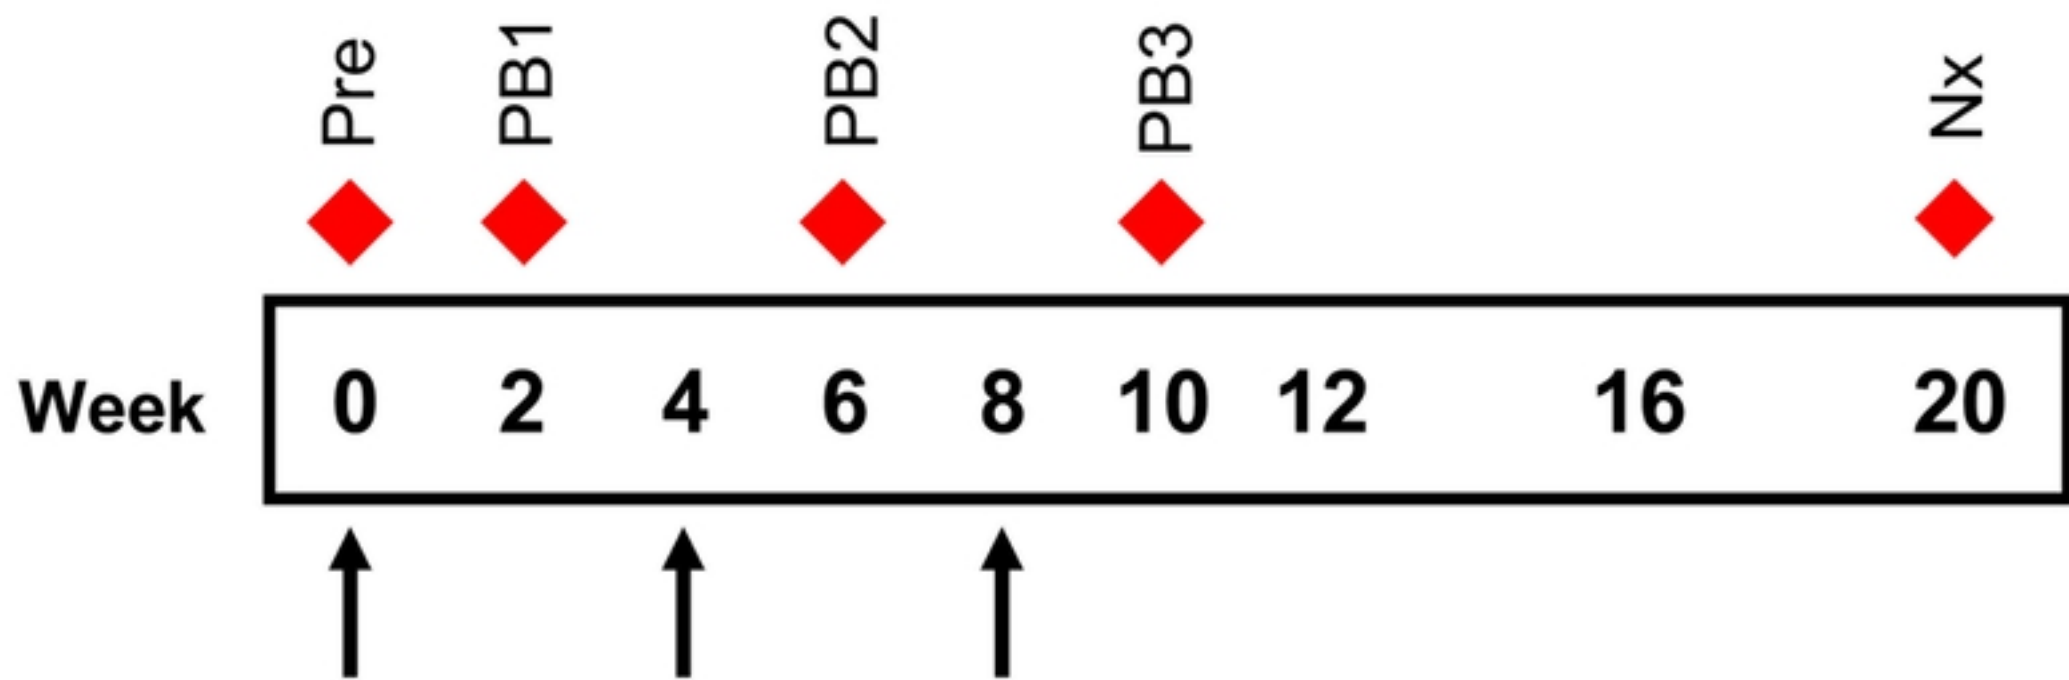

Vaccine dose (3 groups, n=6 in each group):

- 1. **gB FL** – 20 $\mu$ g full-length gB + AddaVax I.M.
- 2. **gB ecto** – 20 $\mu$ g gB ectodomain + AddaVax I.M.
- 3. **gB mRNA** – 50 $\mu$ g gB mRNA-LNP I.D.

Figure 1

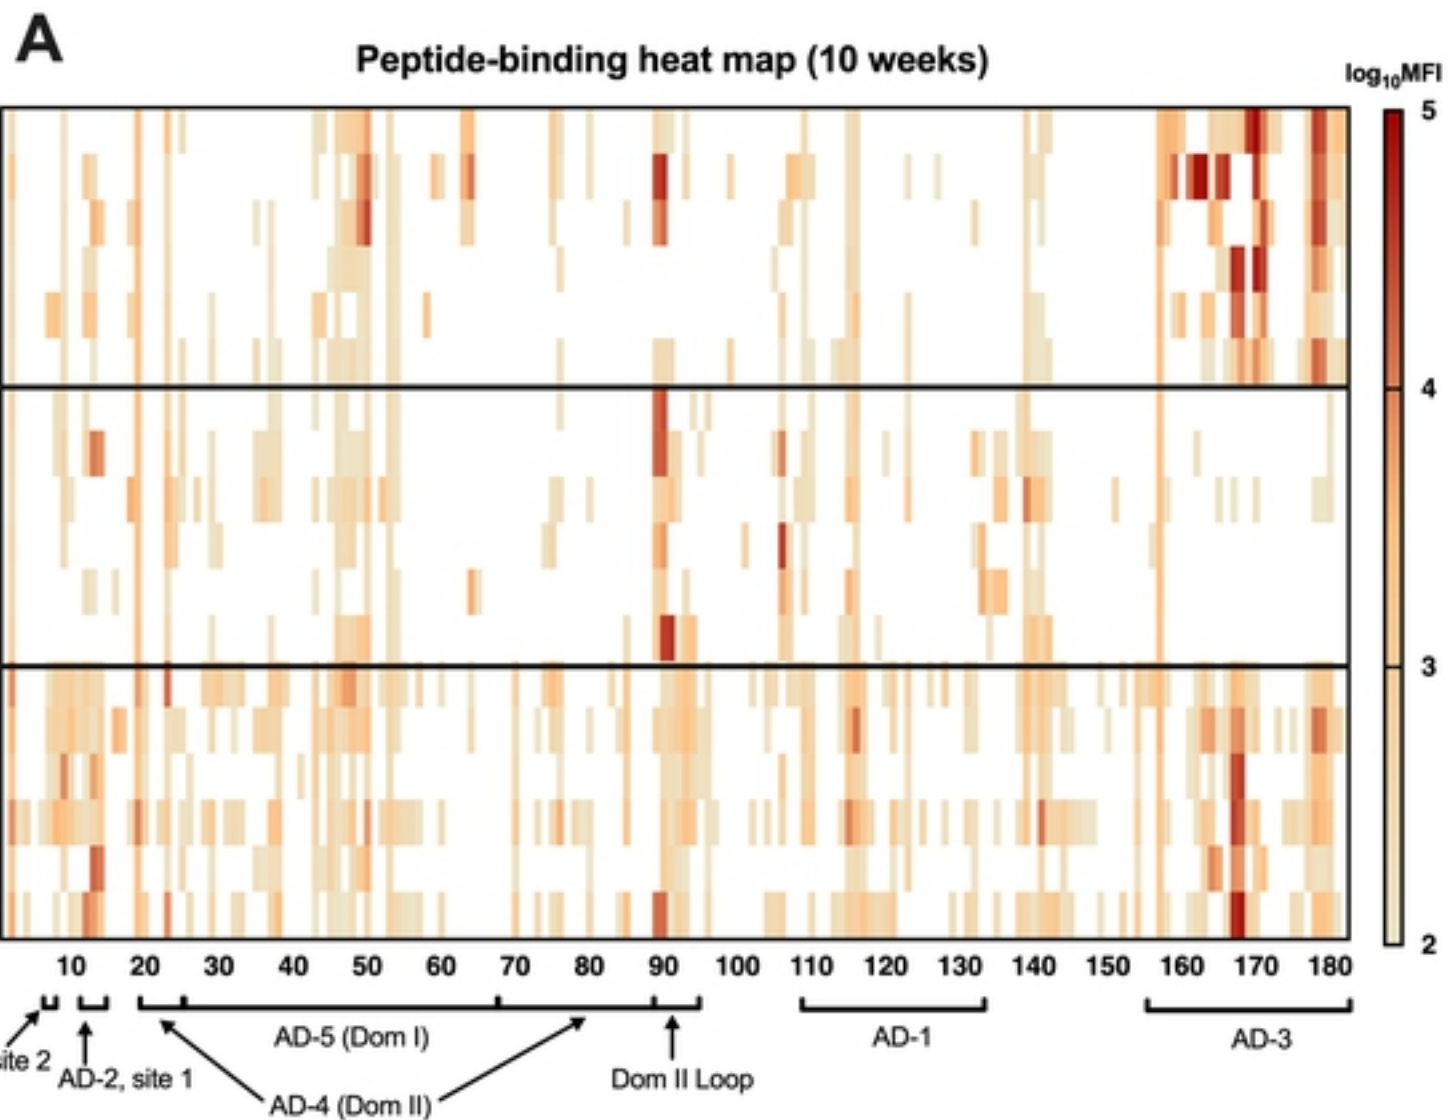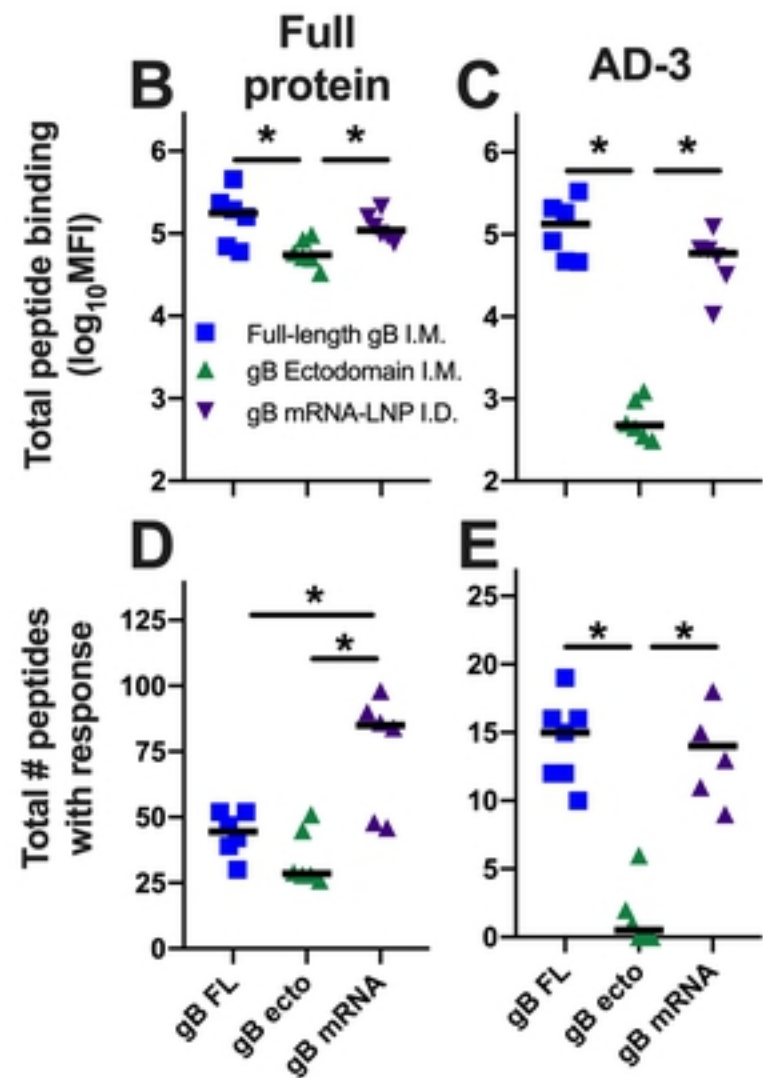

Figure 3



## Neutralizing Epitope Binding

## Neutralization

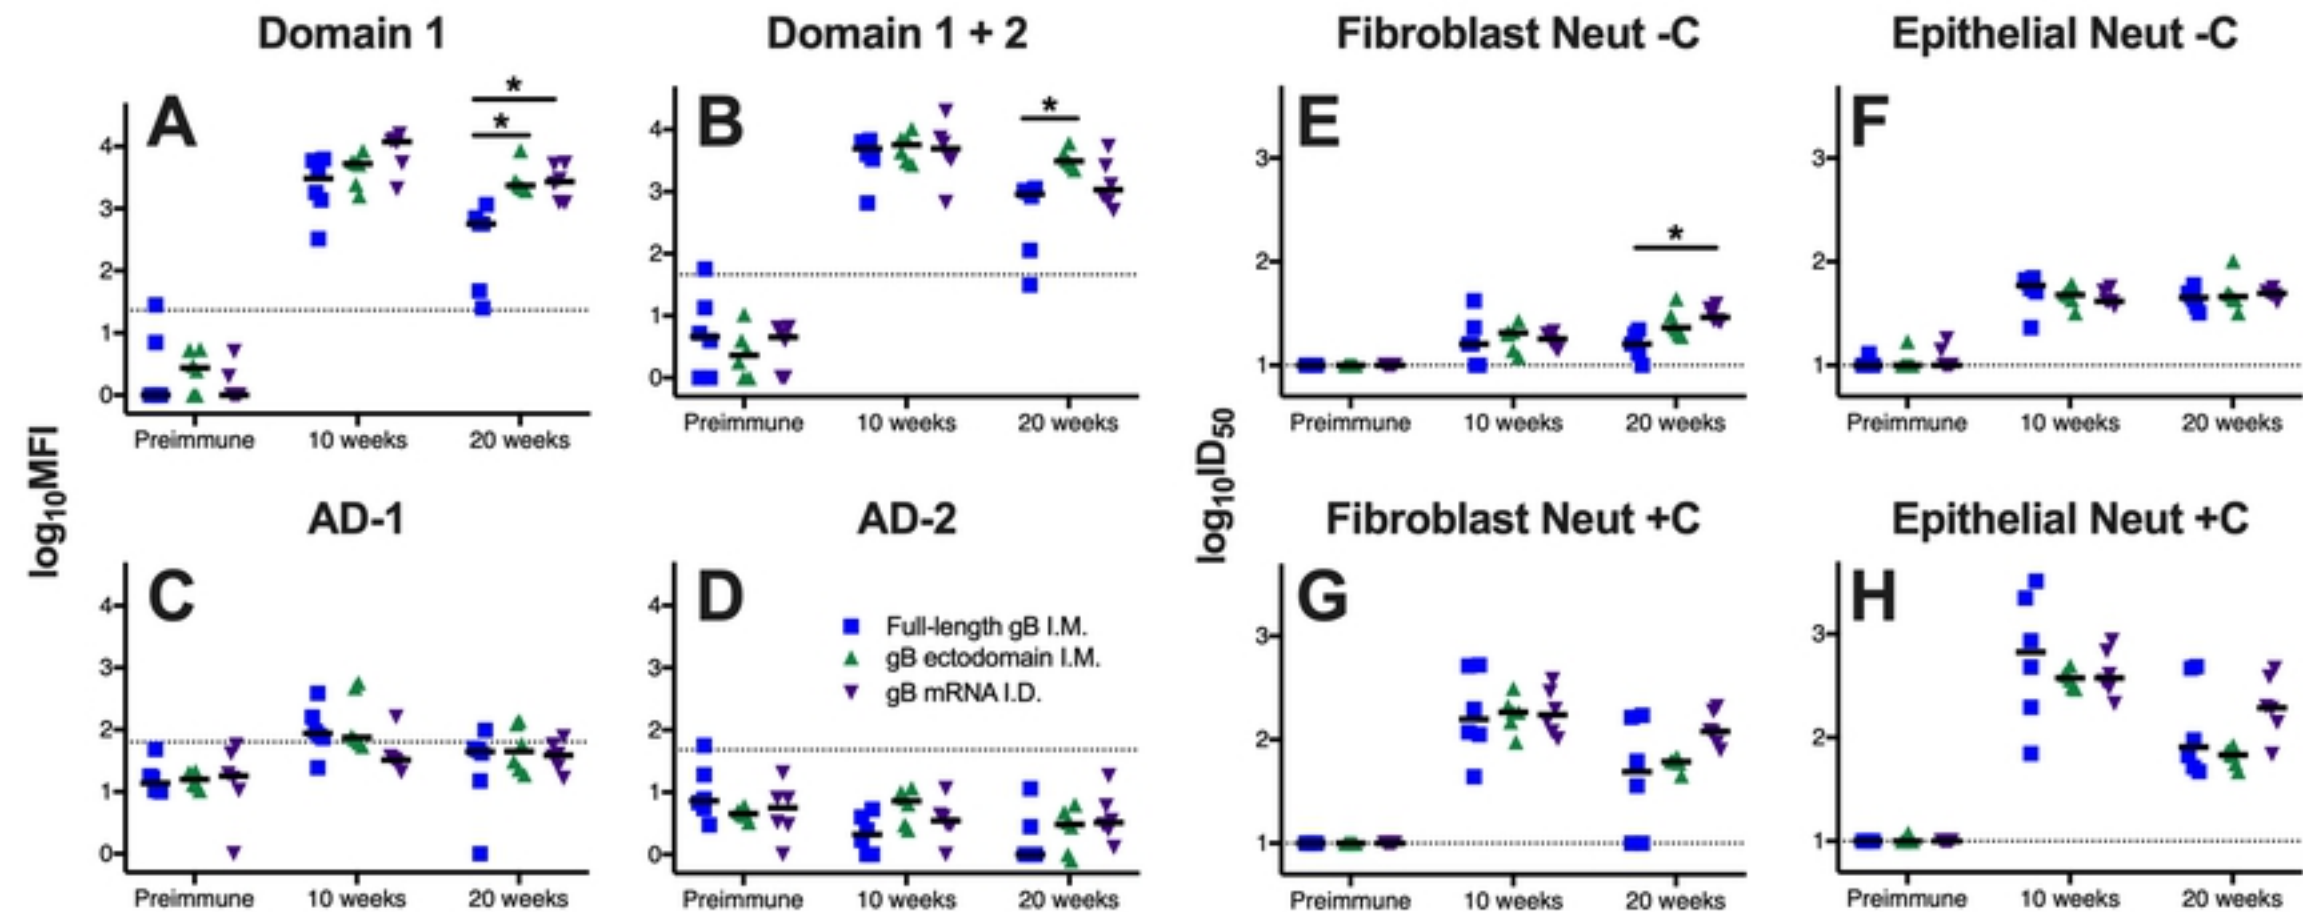

Figure 4
